# Supplementary material for: InCl3 catalyzed simultaneous reductive sulfoximination and O-silylation: synthesis of silyloxy benzylsulfoximine
Source: Royal Society of Chemistry journal article supplement (doi:10.1039/d4ob00713a), 2024-01-01

### 5. $^1\text{H}$ and $^{13}\text{C}$ NMR spectra of synthesized compounds

#### $^1\text{H}$ NMR of **4a** (500 MHz, $\text{CDCl}_3$ )

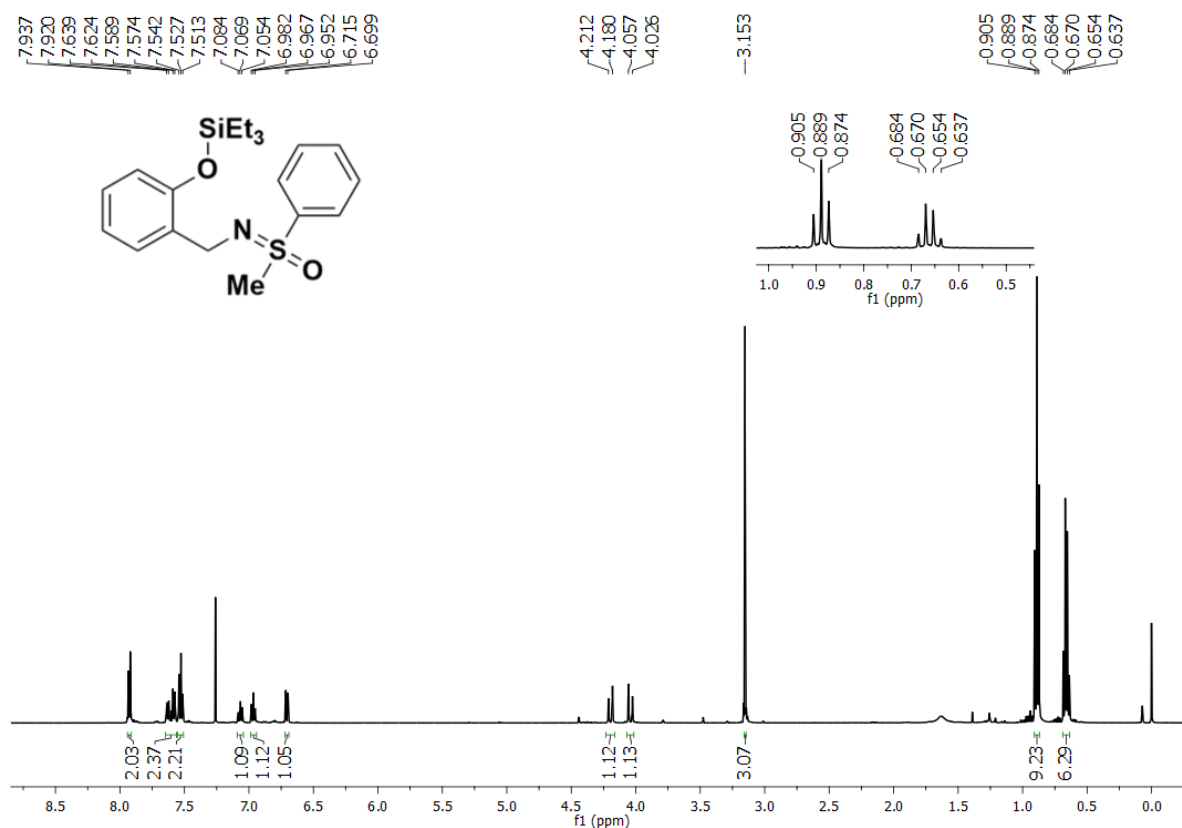

#### $^{13}\text{C}$ $\{^1\text{H}\}$ NMR of **4a** (126 MHz, $\text{CDCl}_3$ )

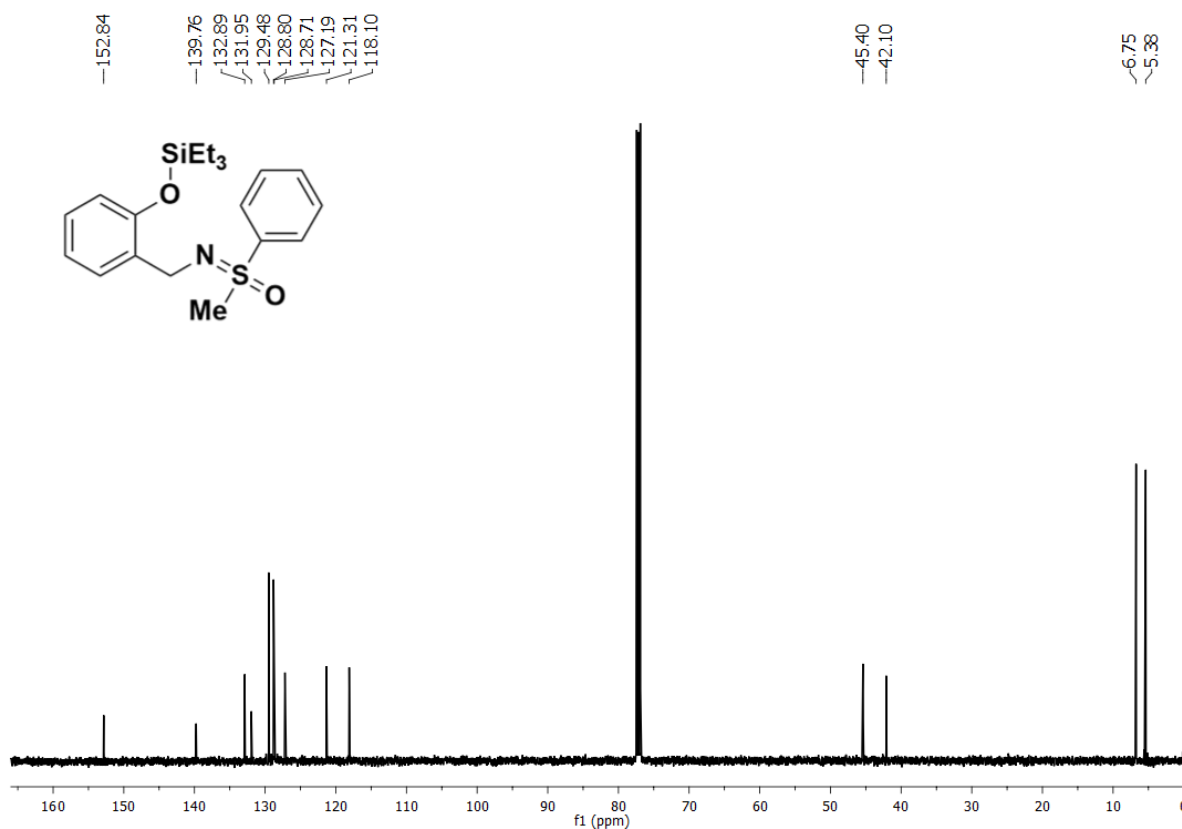

$^1\text{H}$  NMR of **4b** (500 MHz,  $\text{CDCl}_3$ )

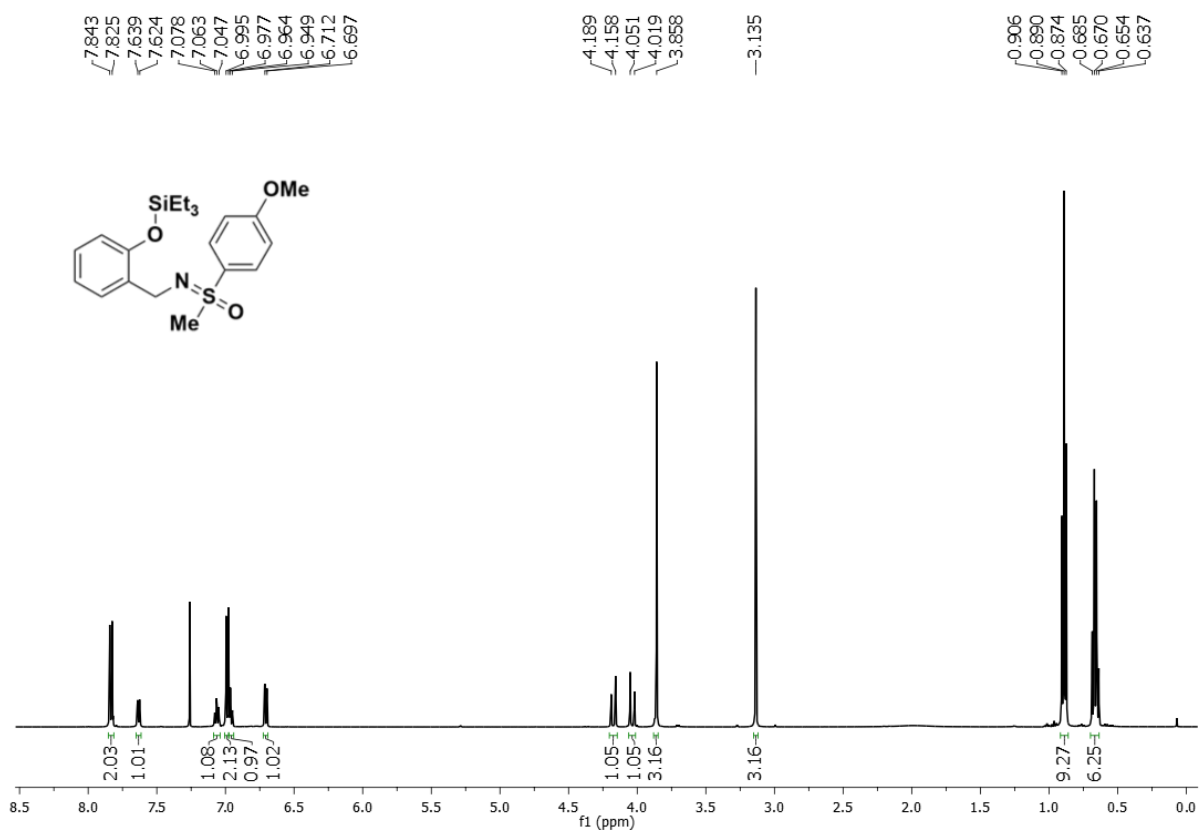

$^{13}\text{C}$  { $^1\text{H}$ } NMR of **4b** (126 MHz,  $\text{CDCl}_3$ )

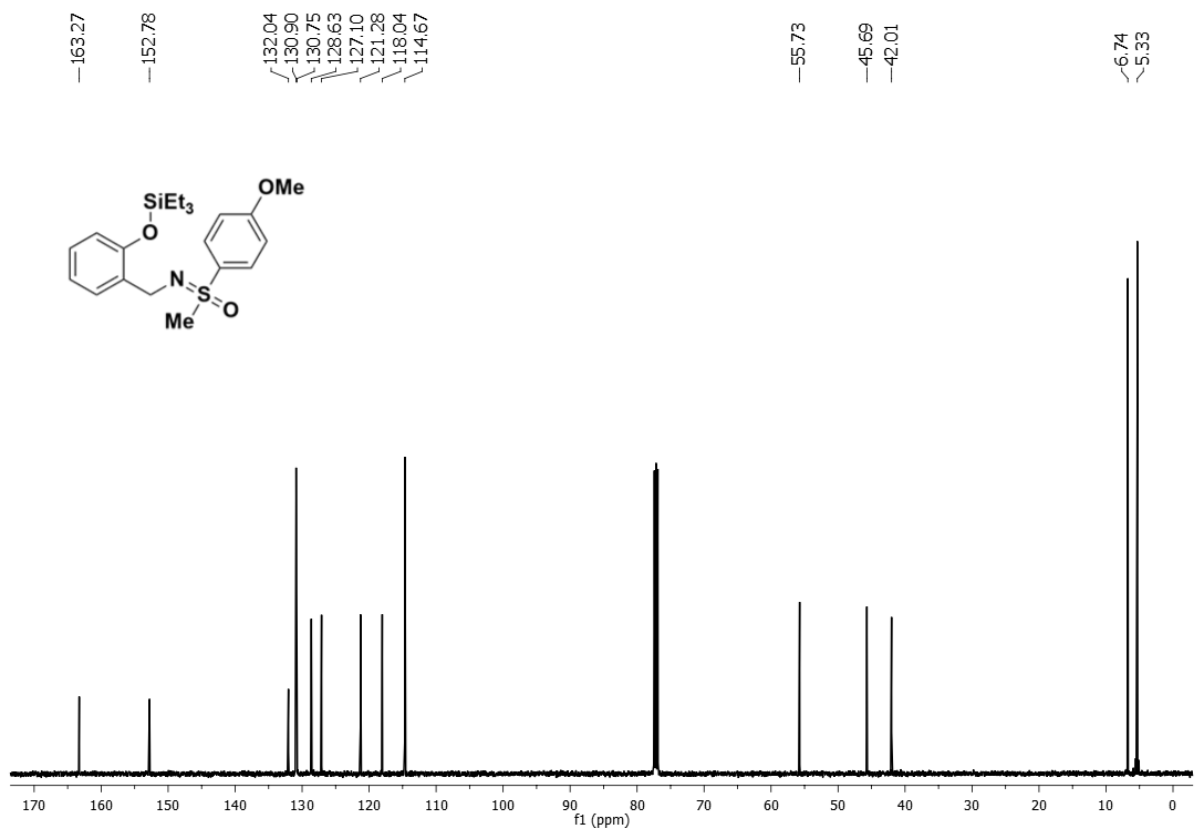

$^1\text{H}$  NMR of **4c** (500 MHz,  $\text{CDCl}_3$ )

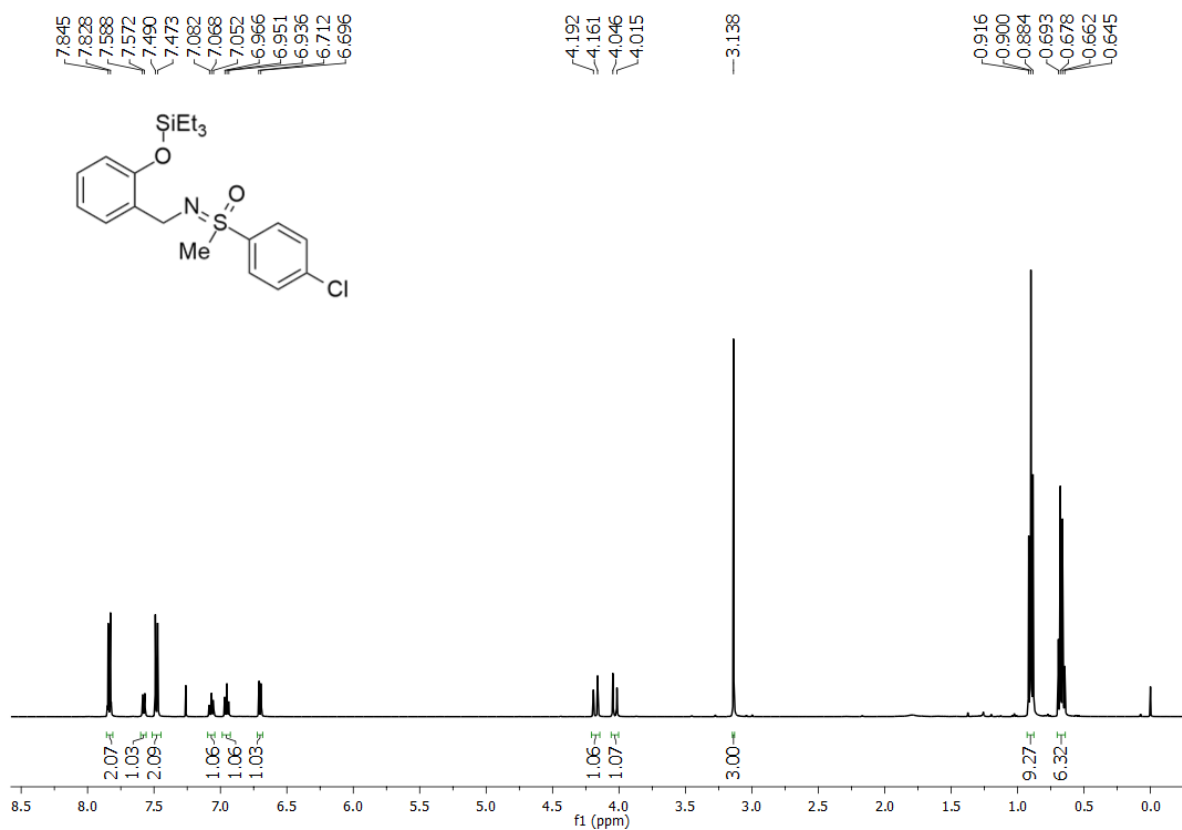

$^{13}\text{C}$  { $^1\text{H}$ } NMR of **4c** (126 MHz,  $\text{CDCl}_3$ )

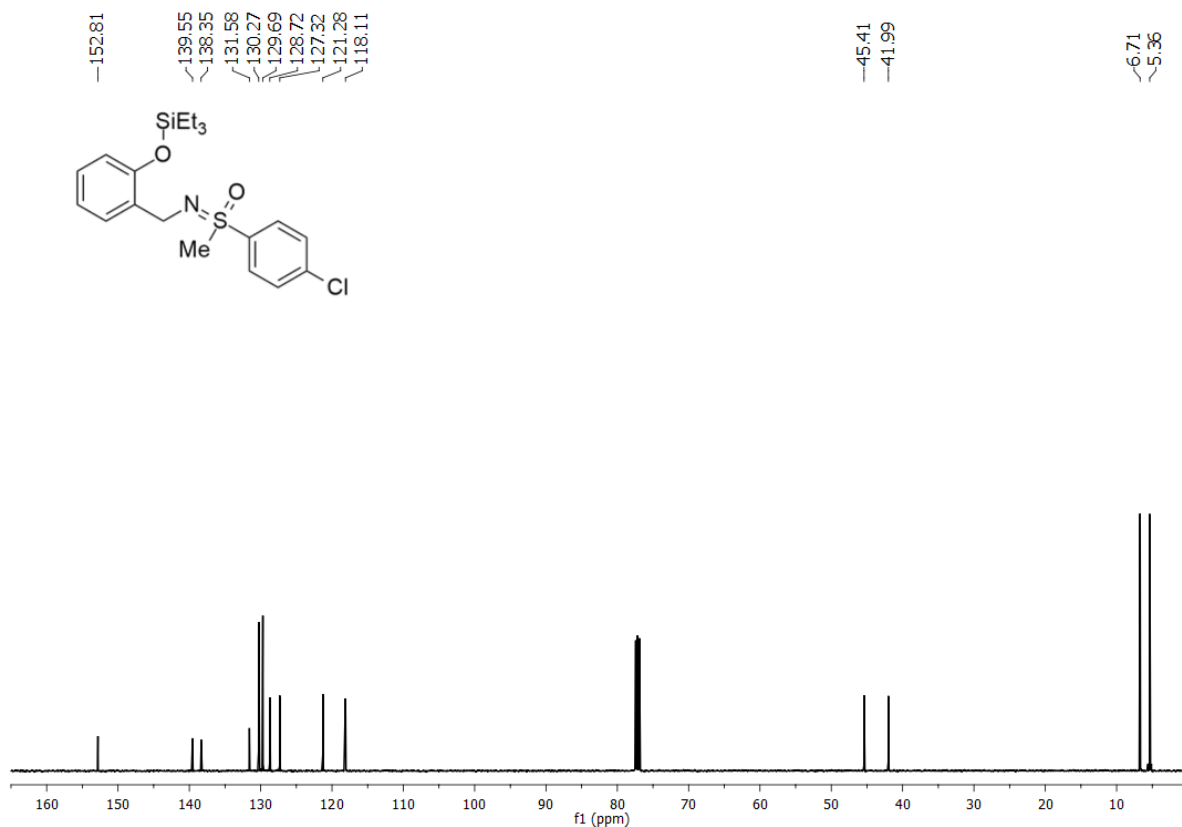

$^1\text{H}$  NMR of **4d** (400 MHz,  $\text{CDCl}_3$ )

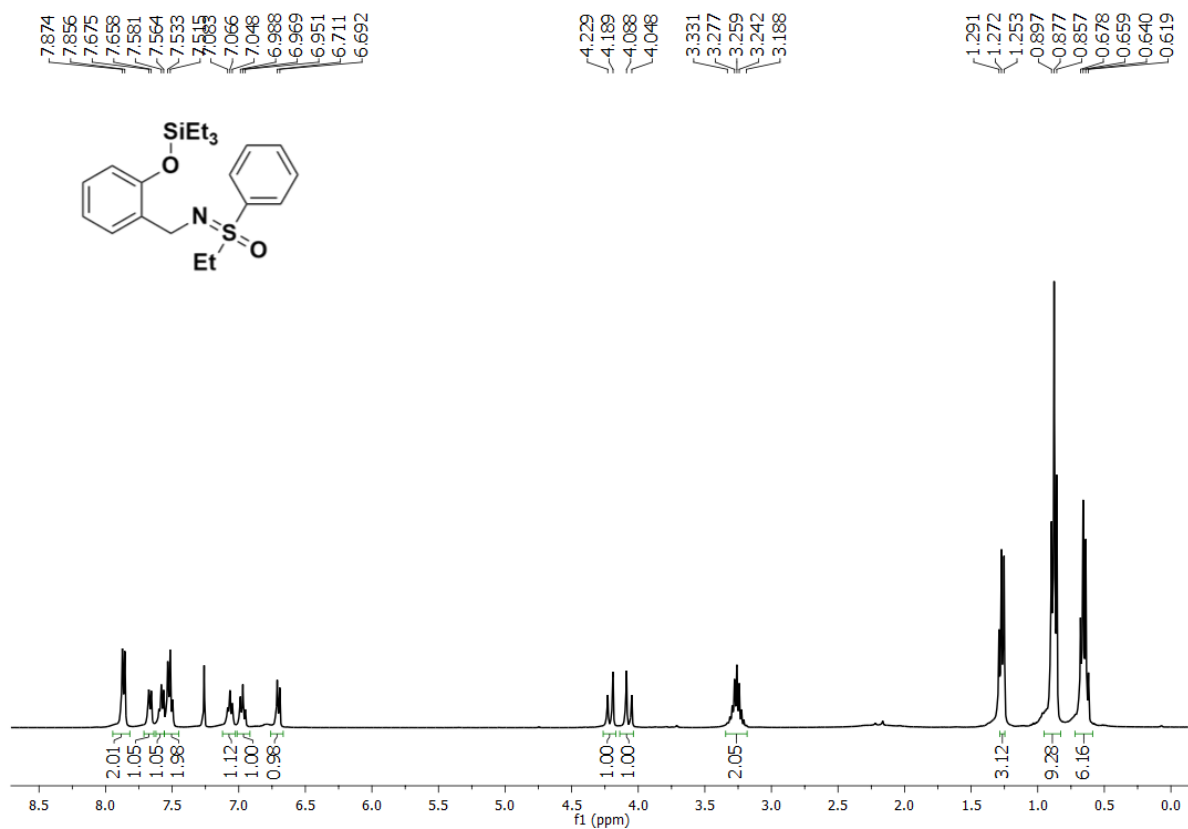

$^{13}\text{C}\{^1\text{H}\}$  NMR of **4d** (101 MHz,  $\text{CDCl}_3$ )

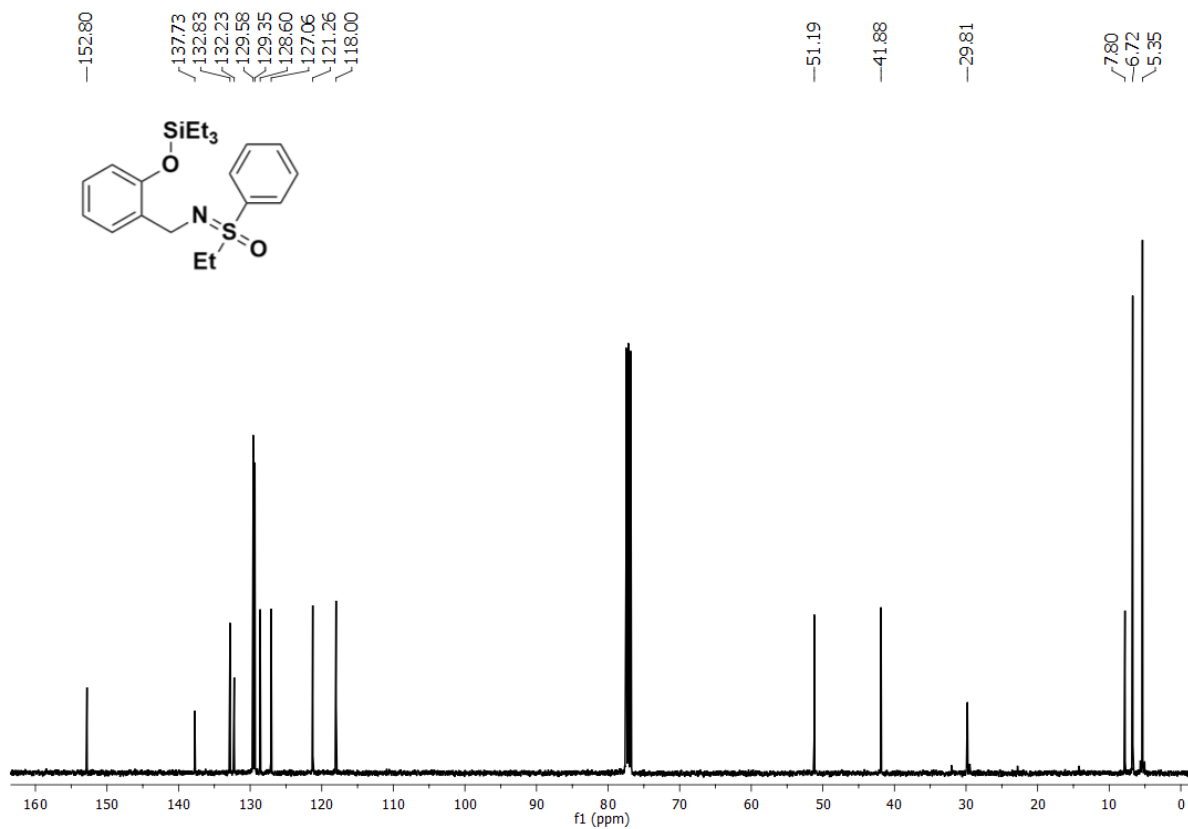

$^1\text{H}$  NMR of **4e** (500 MHz,  $\text{CDCl}_3$ )

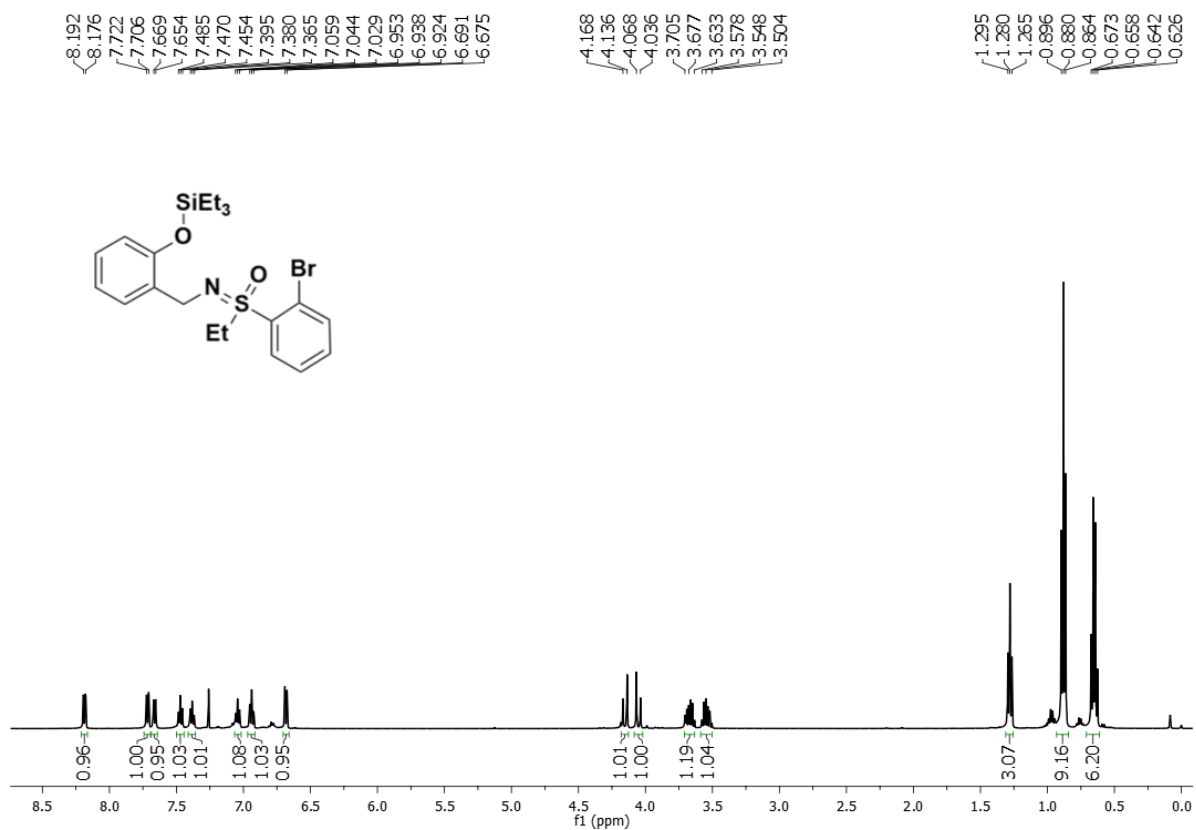

$^{13}\text{C}$  { $^1\text{H}$ } NMR of **4e** (126 MHz,  $\text{CDCl}_3$ )

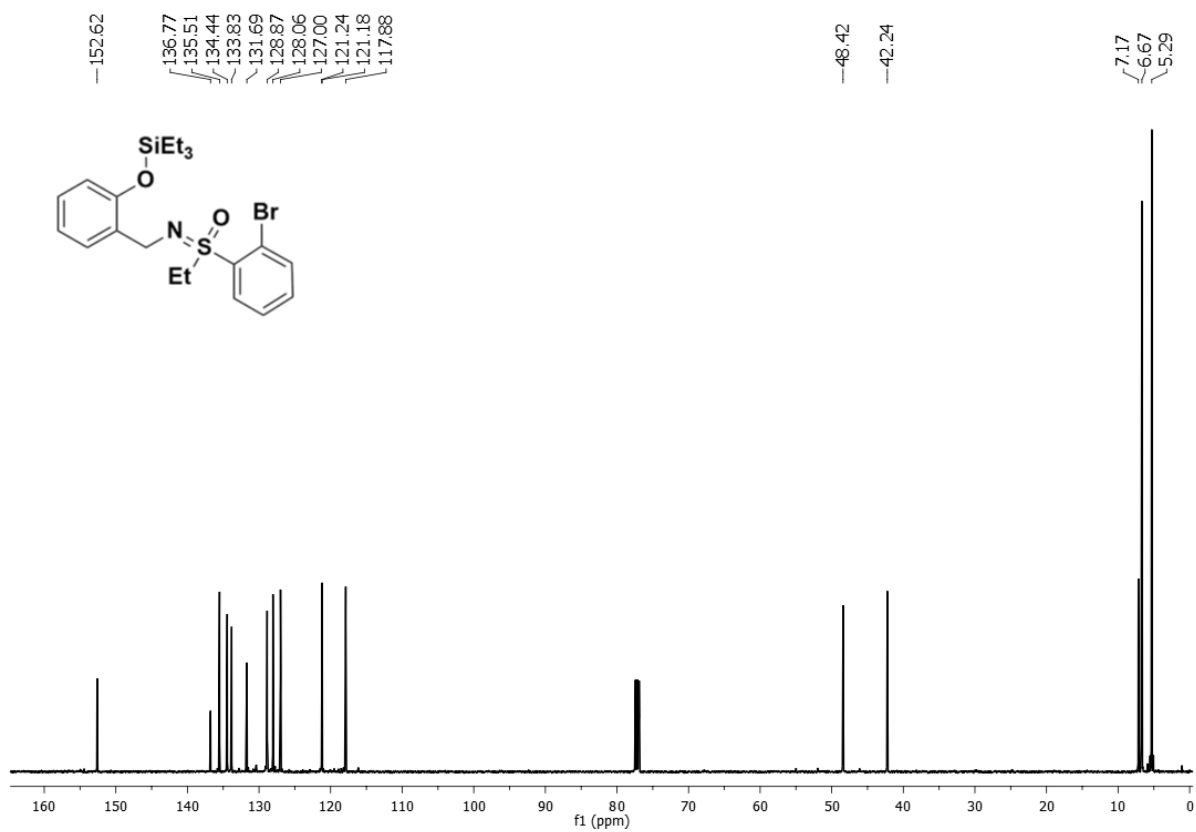

$^1\text{H}$  NMR of **4f** (500 MHz,  $\text{CDCl}_3$ )

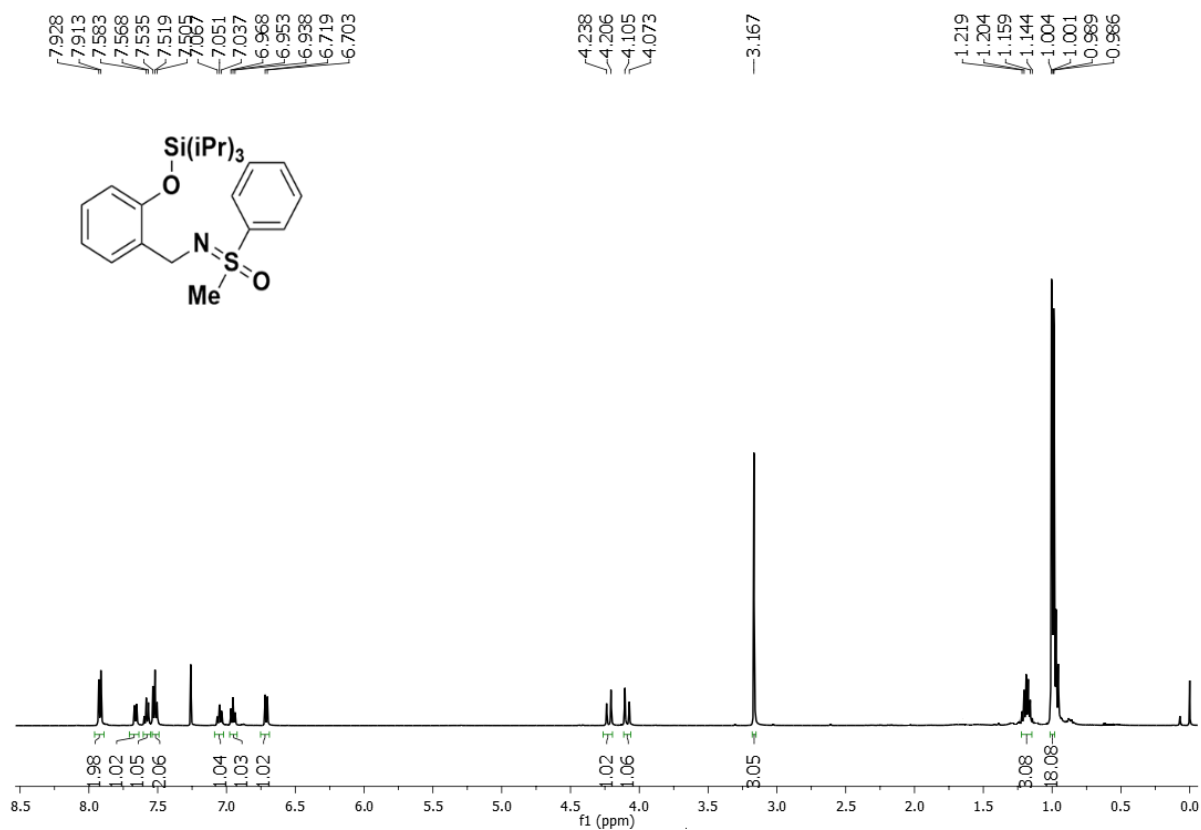

$^{13}\text{C}$  { $^1\text{H}$ } NMR of **4f** (126 MHz,  $\text{CDCl}_3$ )

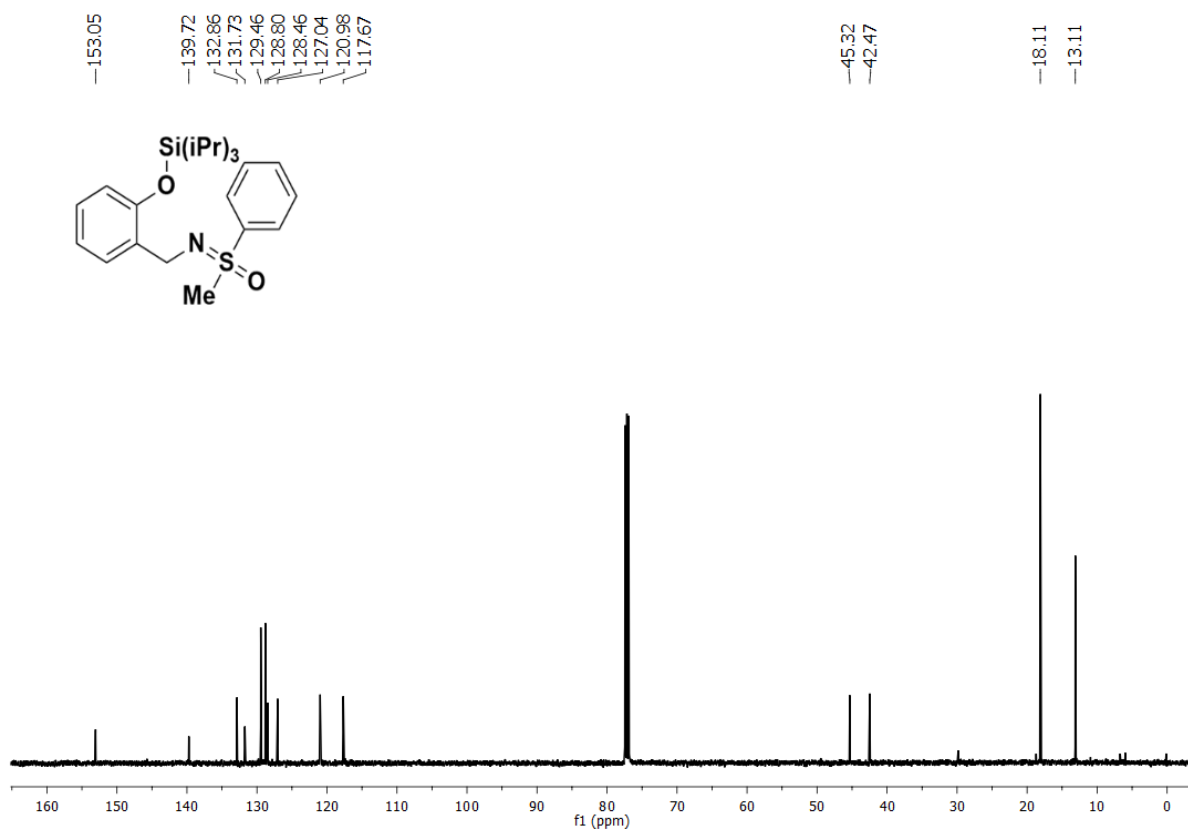

$^1\text{H}$  NMR of **4g** (500 MHz,  $\text{CDCl}_3$ )

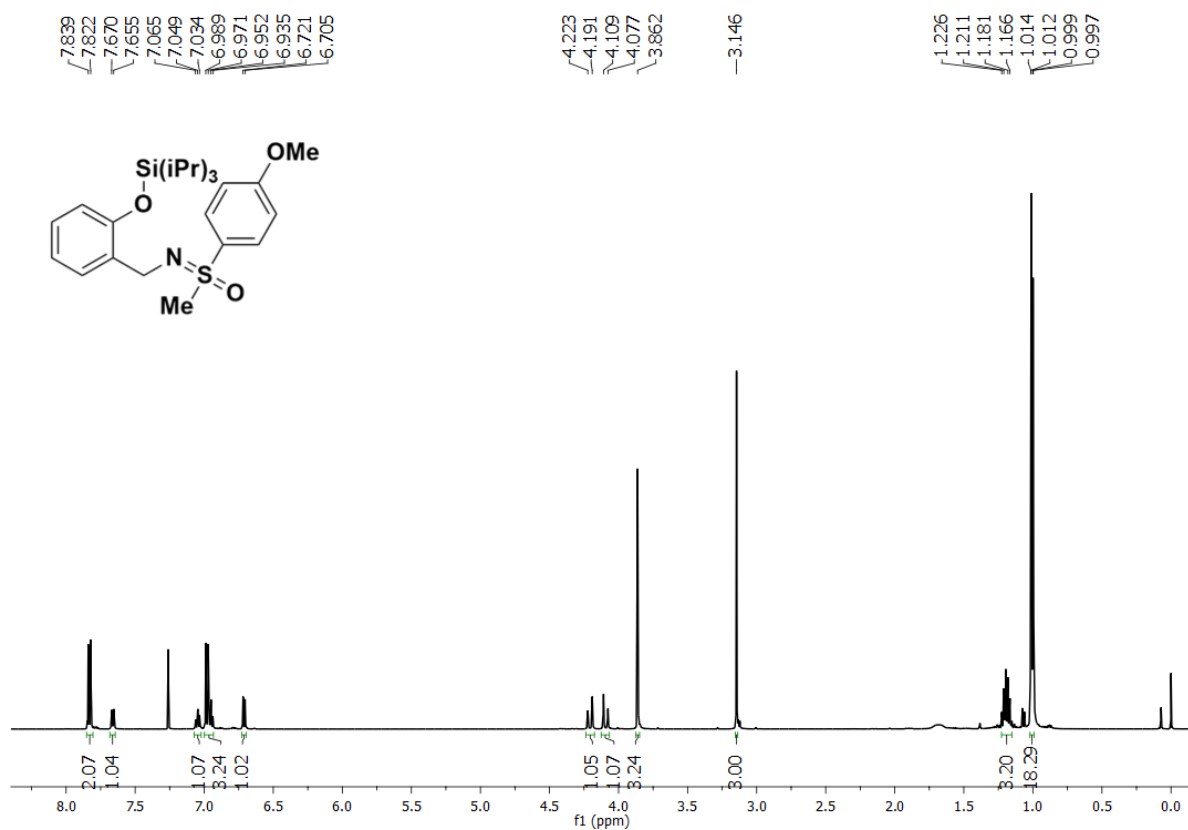

$^{13}\text{C}$  { $^1\text{H}$ } NMR of **4g** (126 MHz,  $\text{CDCl}_3$ )

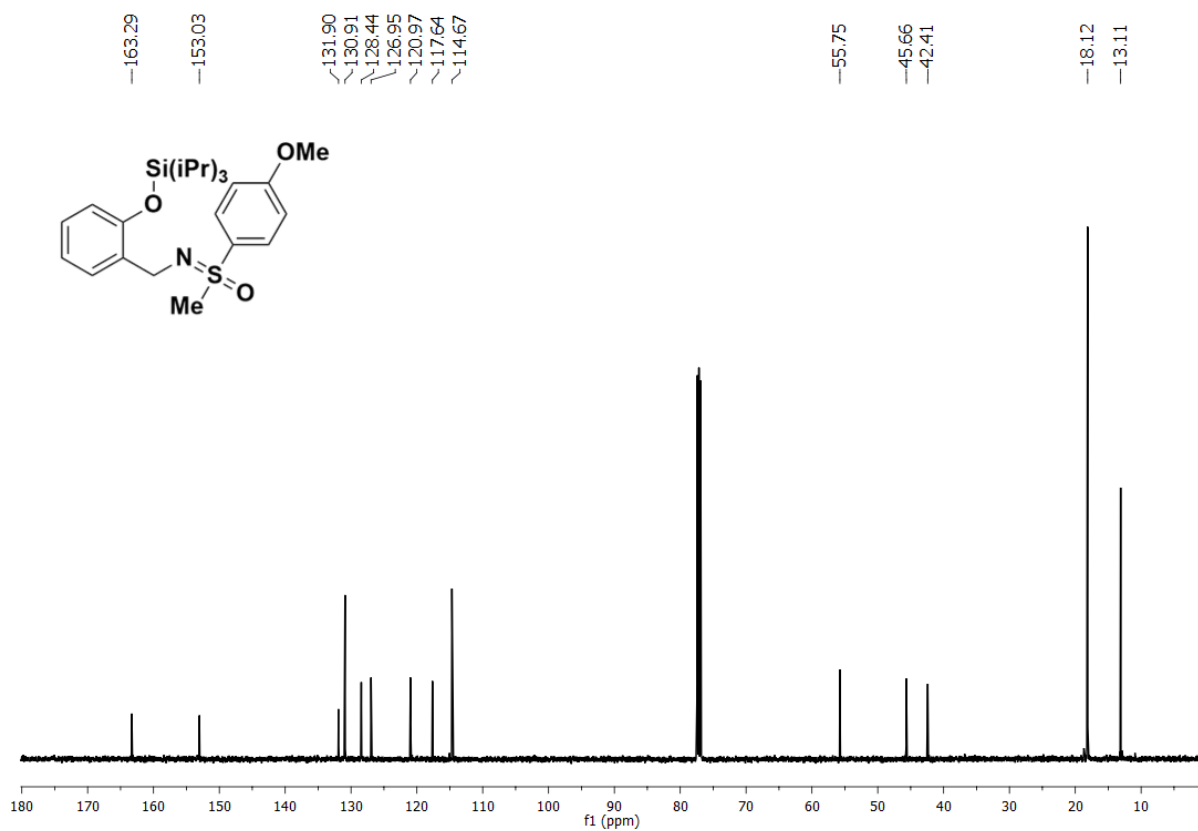

$^1\text{H}$  NMR of **4h** (500 MHz,  $\text{CDCl}_3$ )

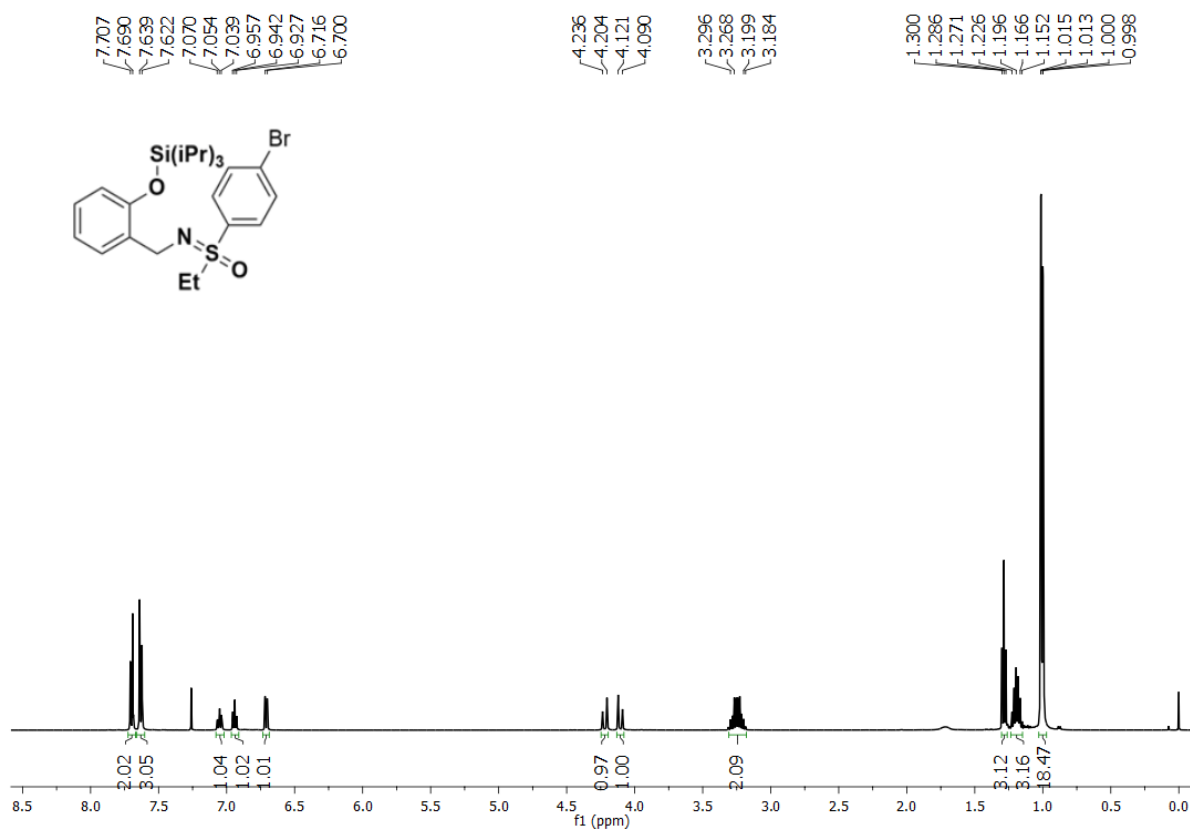

$^{13}\text{C}$  { $^1\text{H}$ } NMR of **4h** (126 MHz,  $\text{CDCl}_3$ )

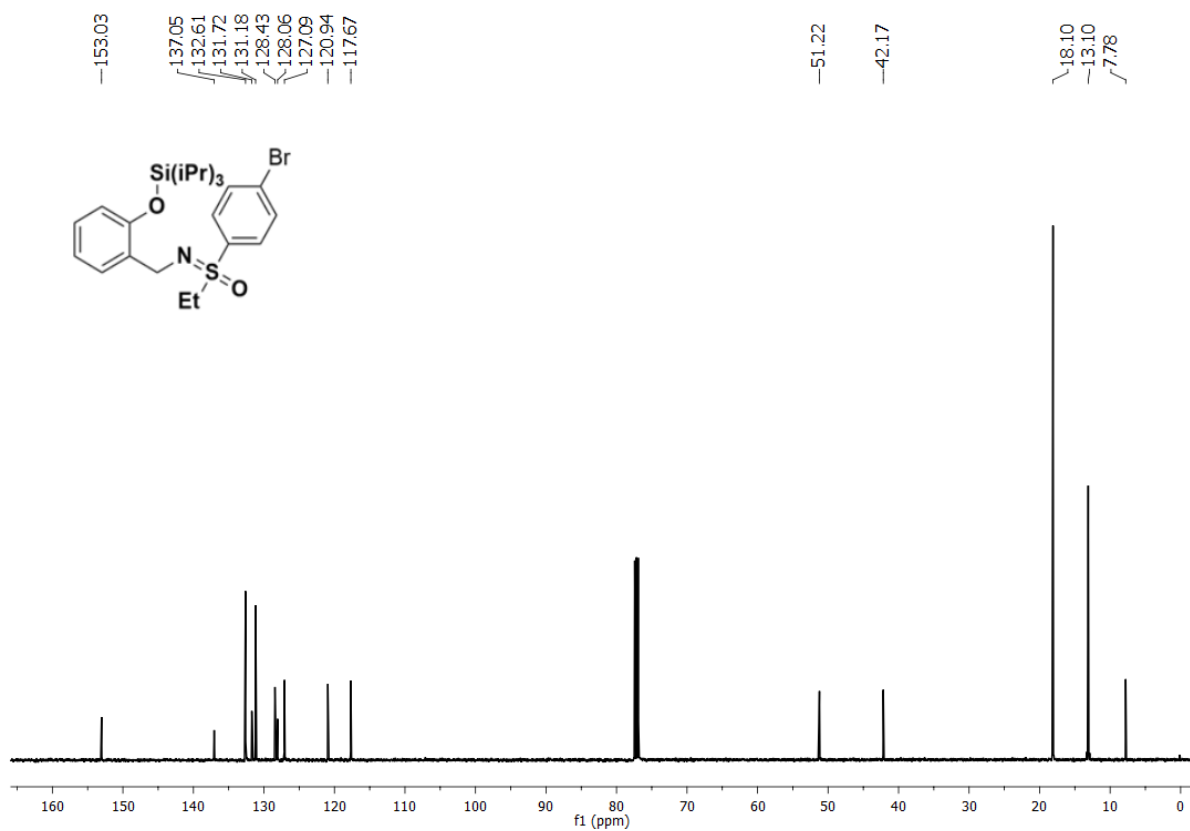



$^1\text{H}$  NMR of **4i** (500 MHz,  $\text{CDCl}_3$ )

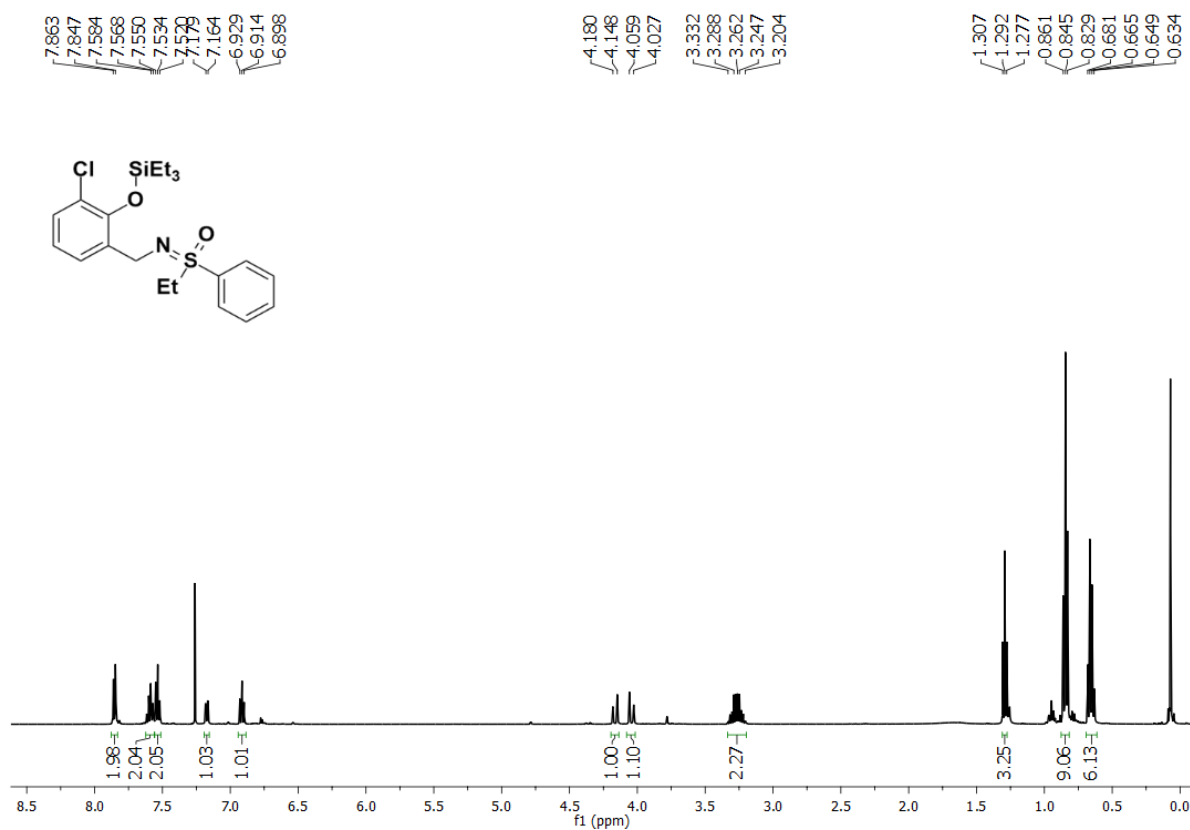

$^{13}\text{C}$  { $^1\text{H}$ } NMR of **4i** (126 MHz,  $\text{CDCl}_3$ )

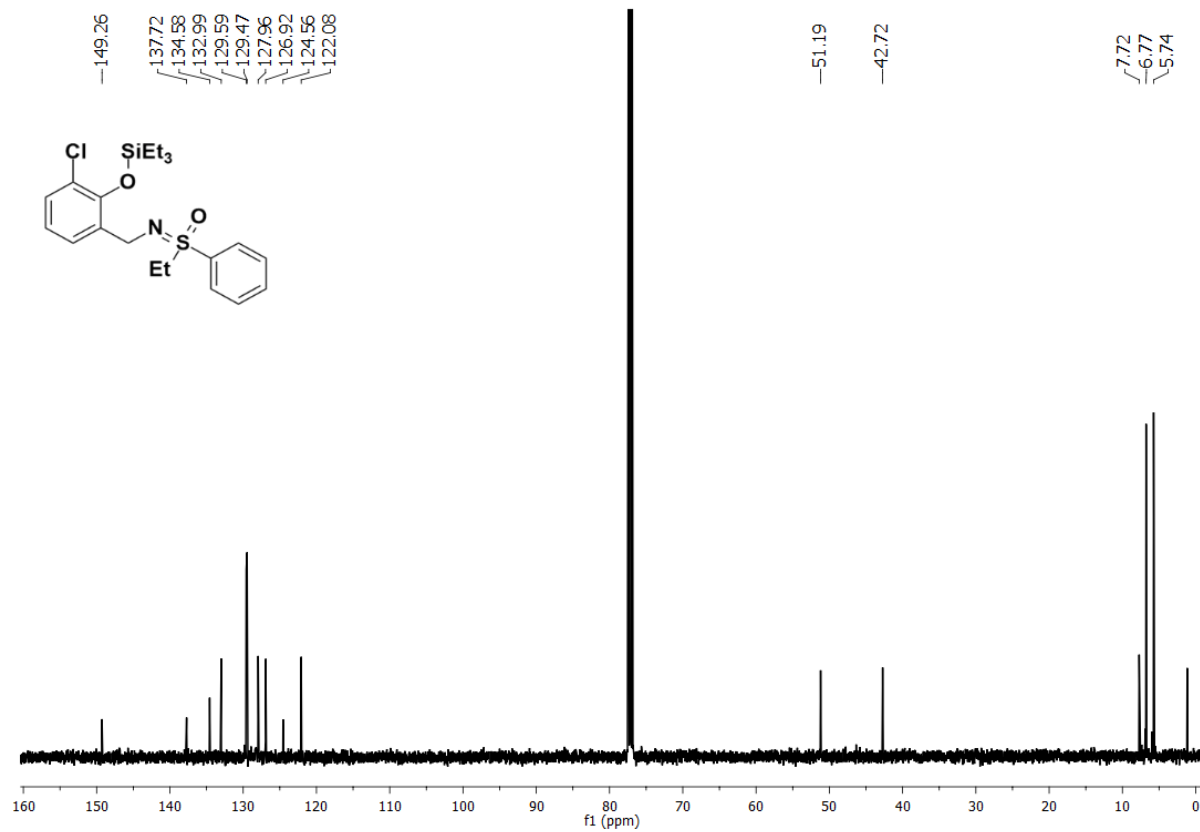

$^1\text{H}$  NMR of **4j** (500 MHz,  $\text{CDCl}_3$ )

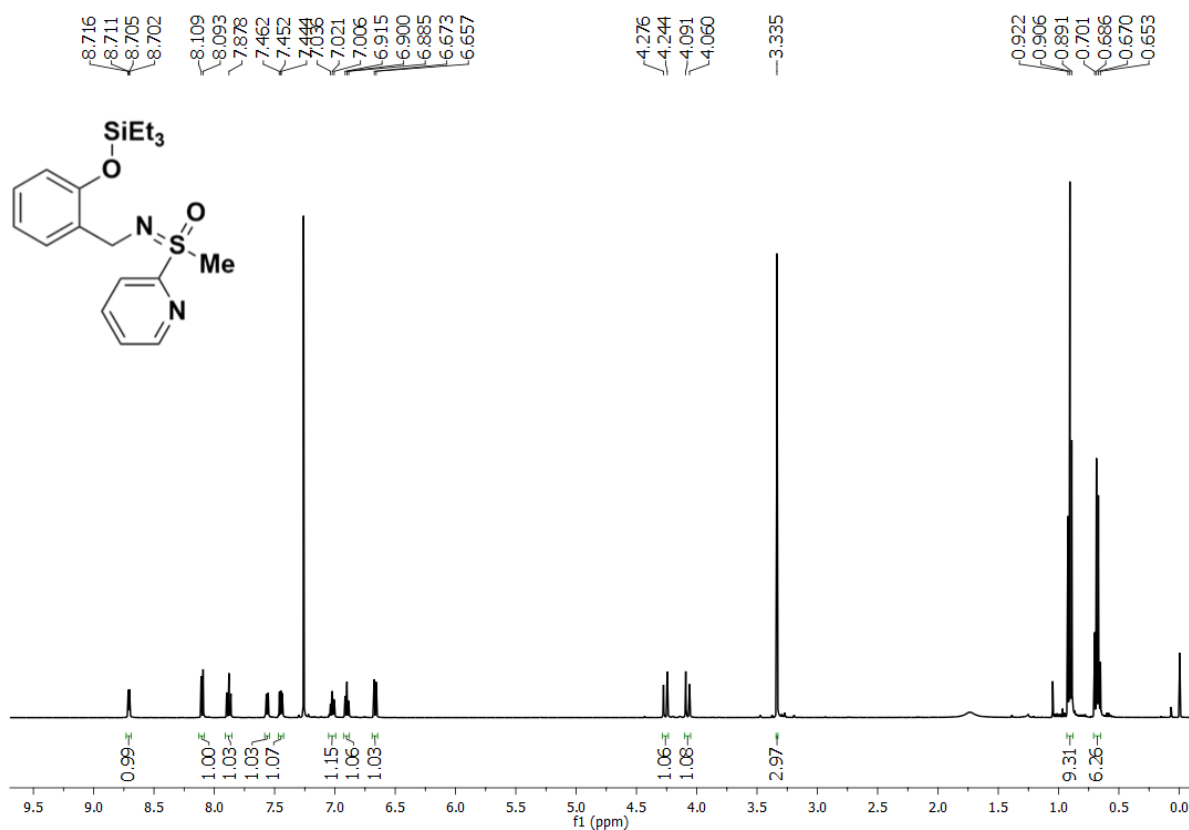

$^{13}\text{C}$  { $^1\text{H}$ } NMR of **4j** (126 MHz,  $\text{CDCl}_3$ )

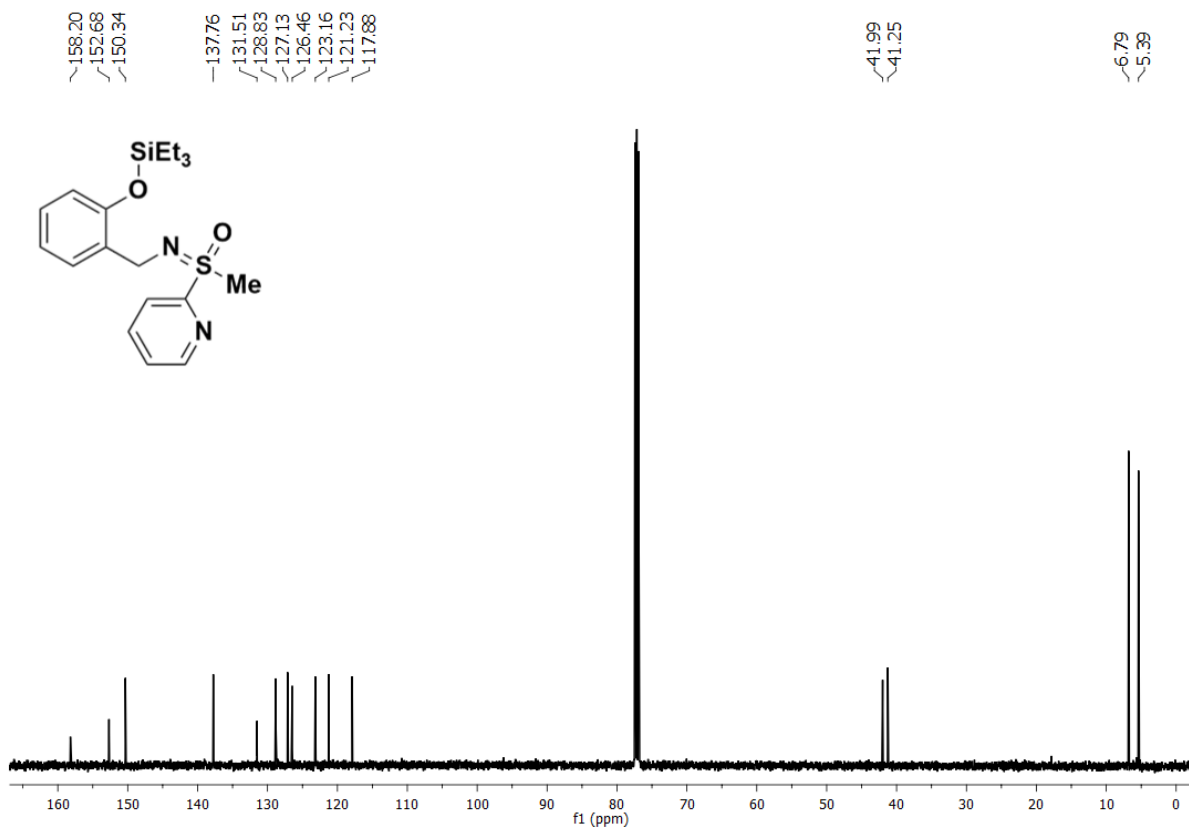

$^1\text{H}$  NMR of **4k** (500 MHz,  $\text{CDCl}_3$ )

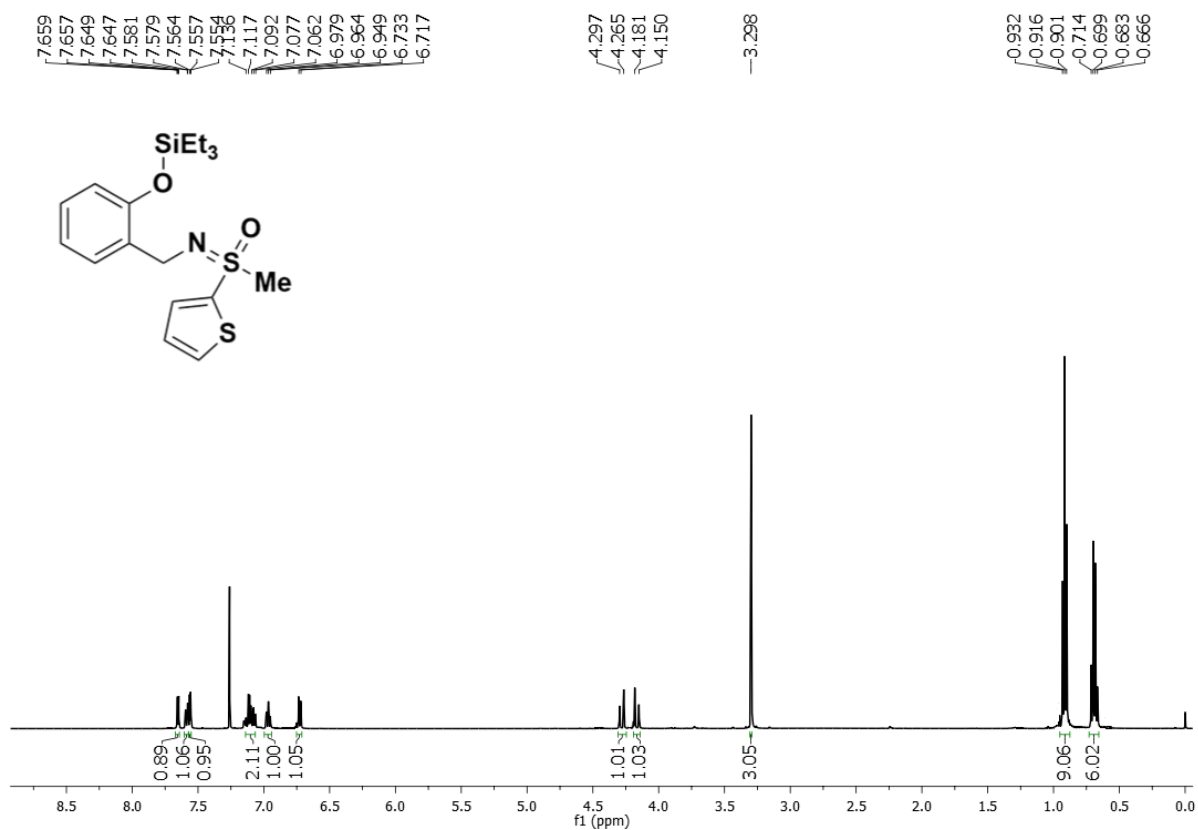

$^{13}\text{C}$  { $^1\text{H}$ } NMR of **4k** (126 MHz,  $\text{CDCl}_3$ )

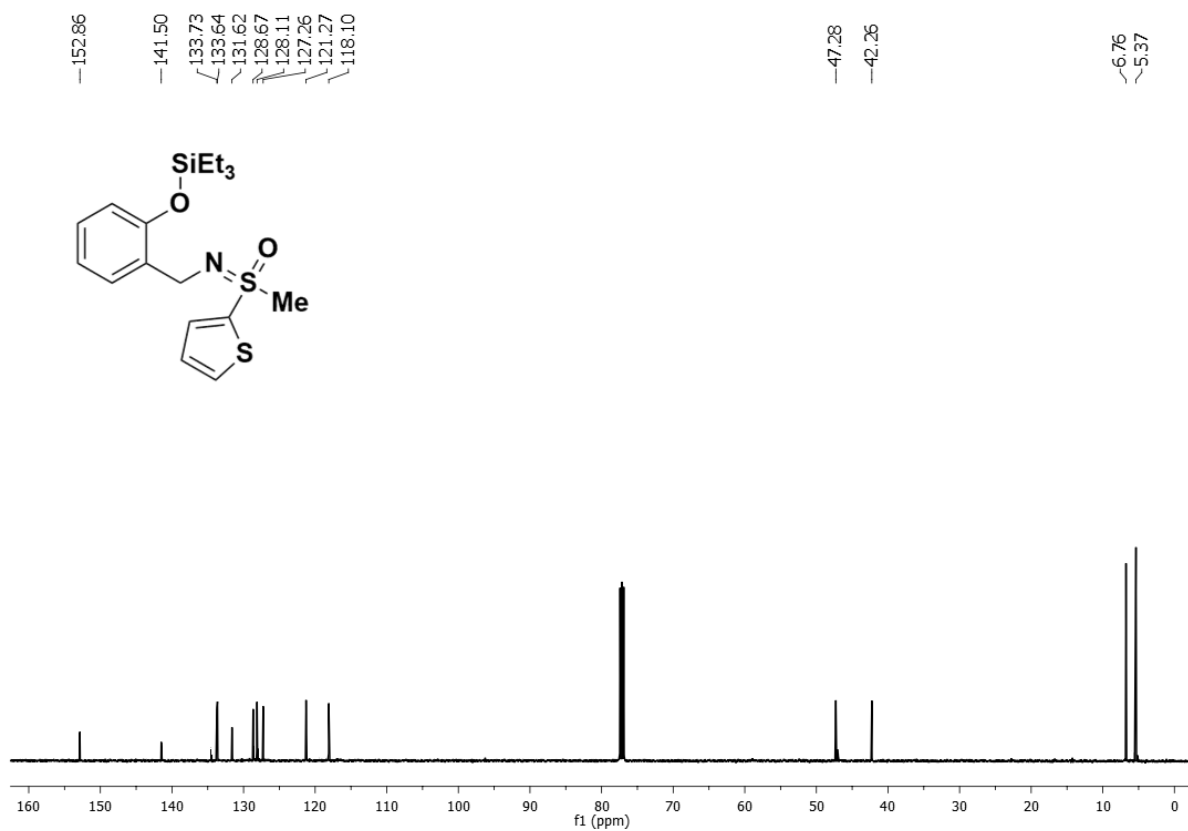

$^1\text{H}$  NMR of **4I** (500 MHz,  $\text{CDCl}_3$ )

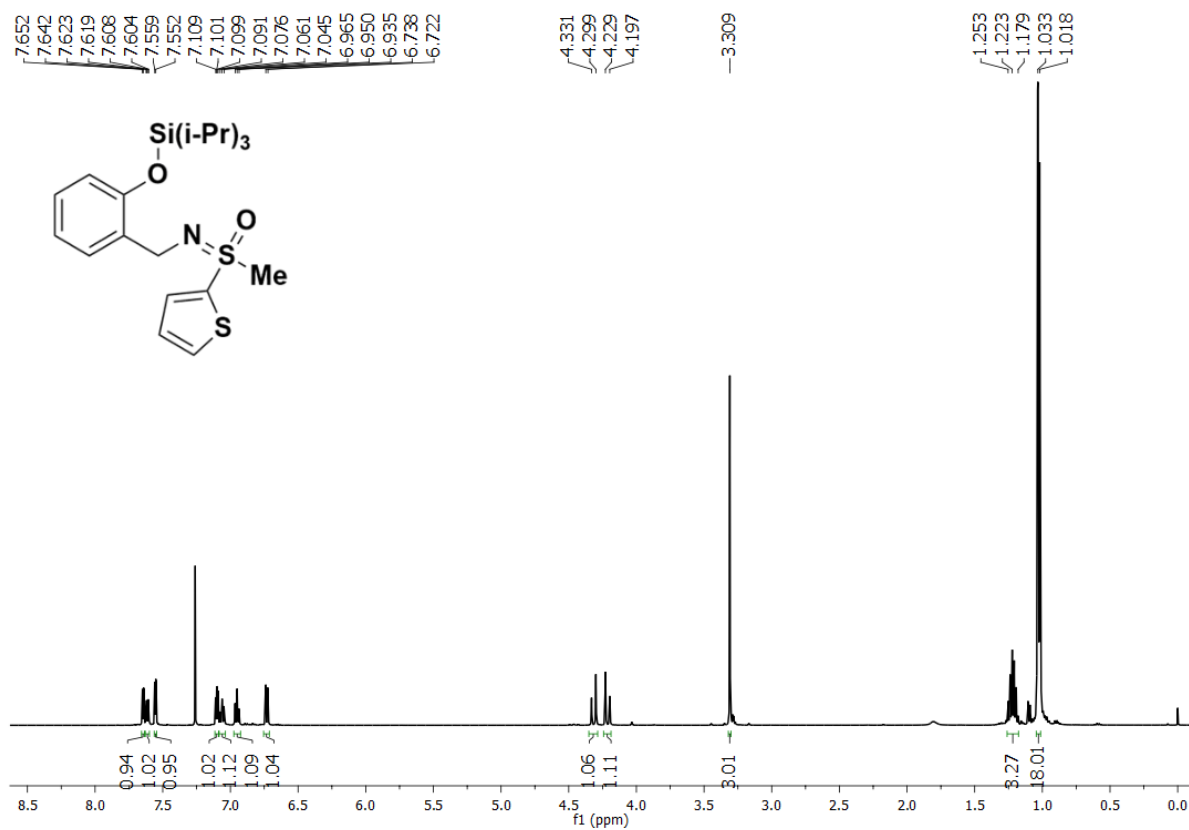

$^{13}\text{C}$  { $^1\text{H}$ } NMR of **4I** (126 MHz,  $\text{CDCl}_3$ )

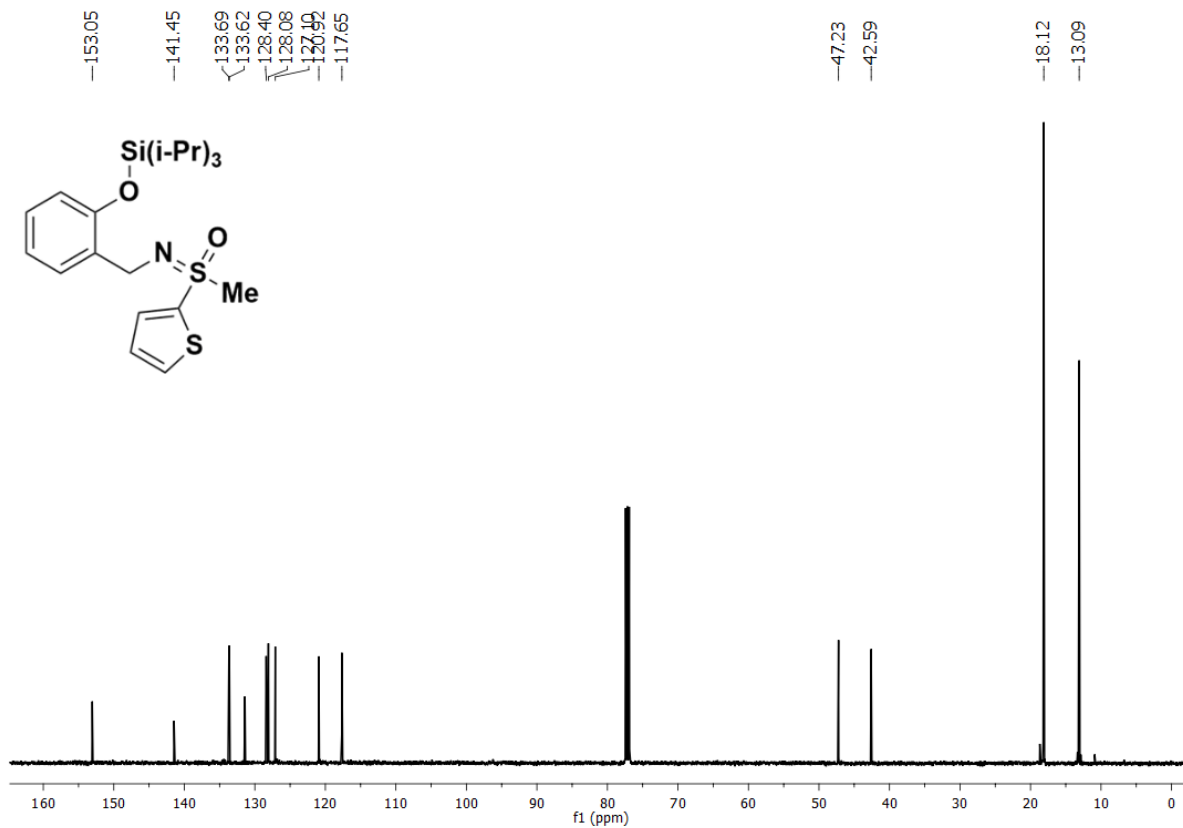

Supplement: d4ob00713a2.pdf [file d4ob00713a2.pdf]
