# Supplementary material for: InCl3 catalyzed simultaneous reductive sulfoximination and O-silylation: synthesis of silyloxy benzylsulfoximine
Source: Royal Society of Chemistry journal article supplement (doi:10.1039/d4ob00713a), 2024-01-01

$^1\text{H}$  NMR of **4m** (500 MHz,  $\text{CDCl}_3$ )

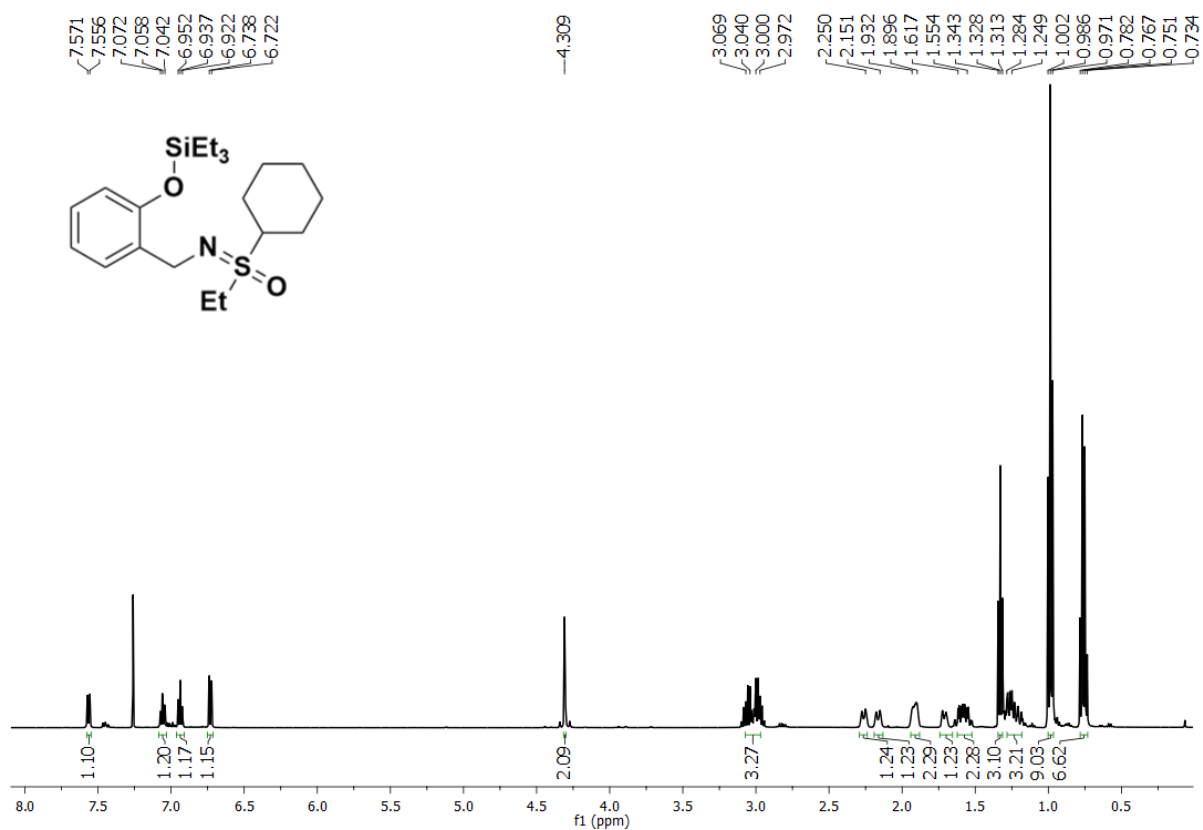

$^{13}\text{C}$  { $^1\text{H}$ } NMR of **4m** (126 MHz,  $\text{CDCl}_3$ )

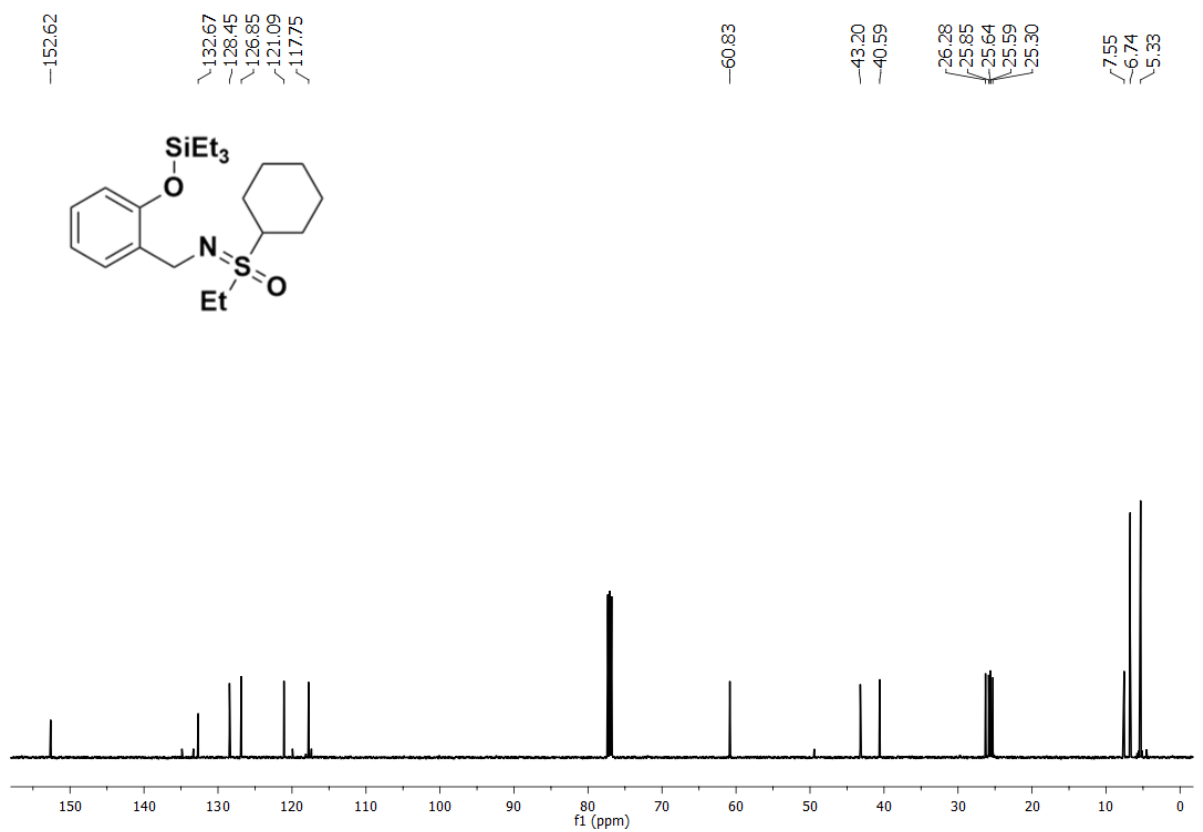

$^1\text{H}$  NMR of **4n** (500 MHz,  $\text{CDCl}_3$ )

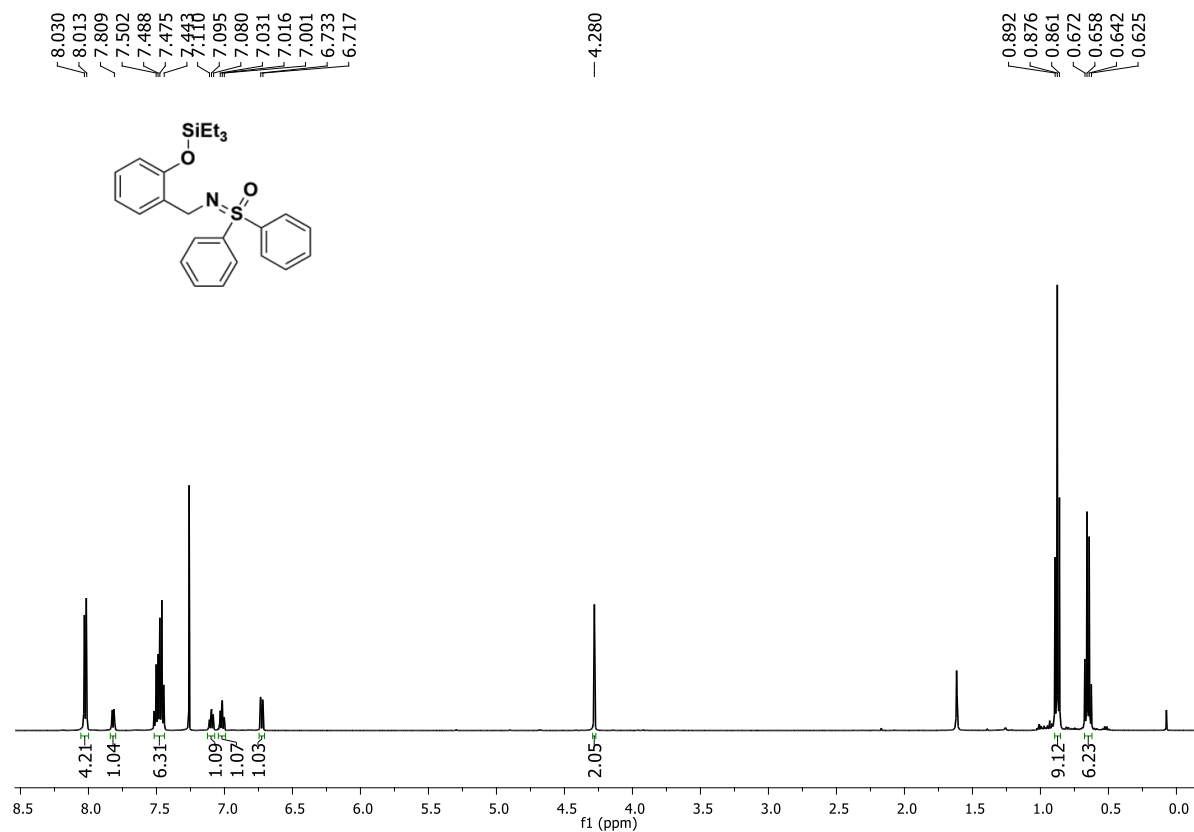

$^{13}\text{C}$  { $^1\text{H}$ } NMR of **4n** (126 MHz,  $\text{CDCl}_3$ )

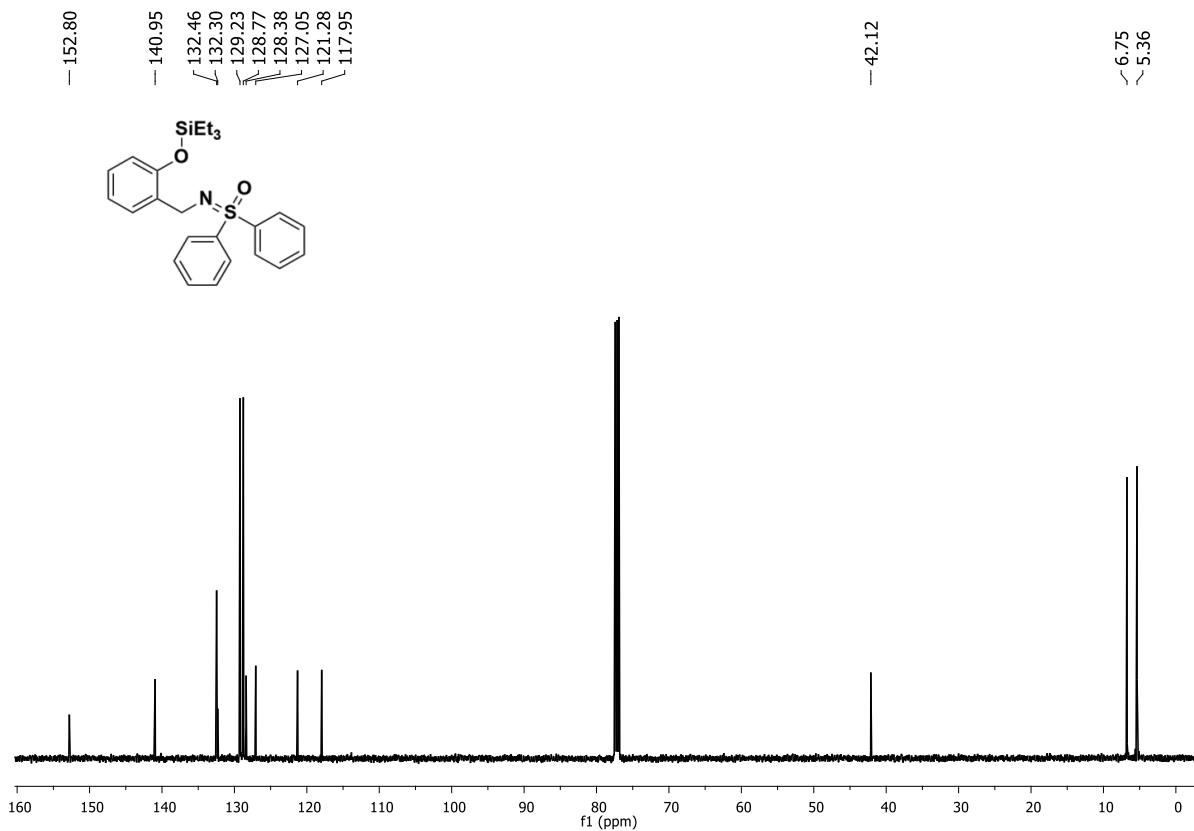

$^1\text{H}$  NMR of **4o** (500 MHz,  $\text{CDCl}_3$ )

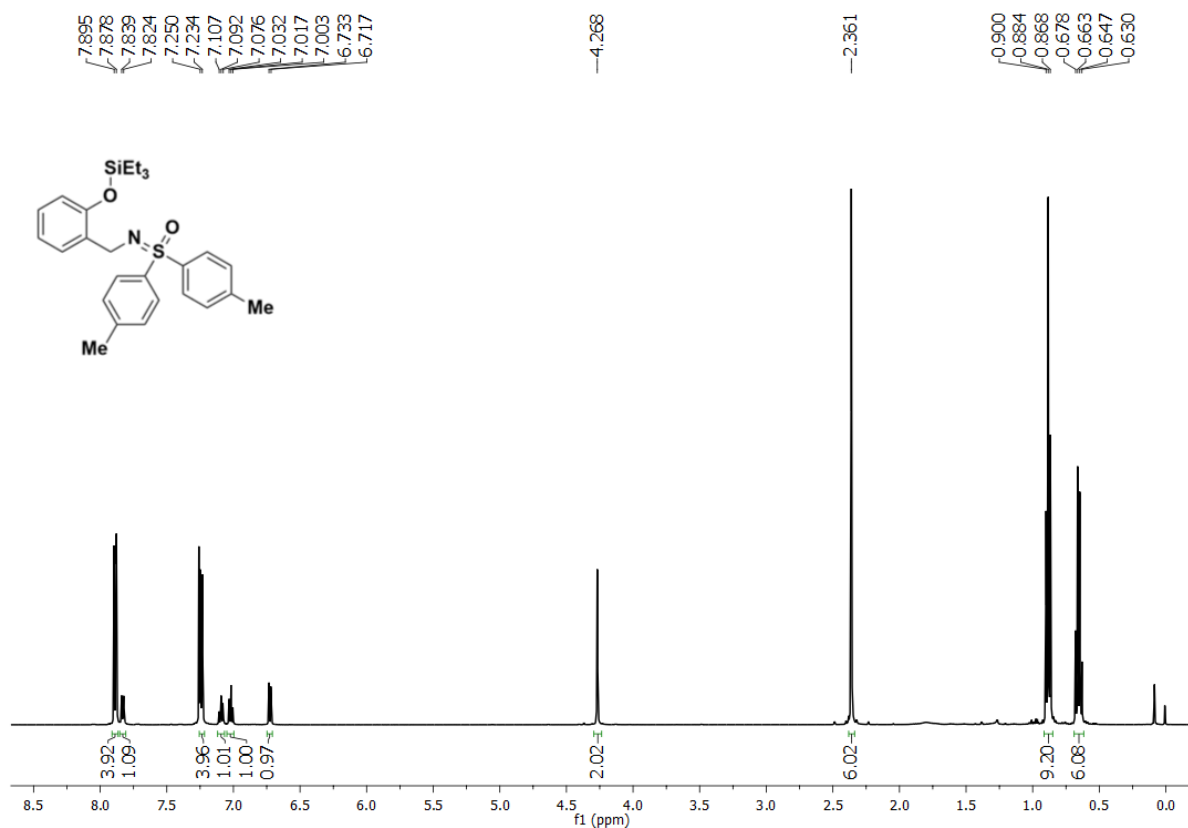

$^{13}\text{C}$  { $^1\text{H}$ } NMR of **4o** (126 MHz,  $\text{CDCl}_3$ )

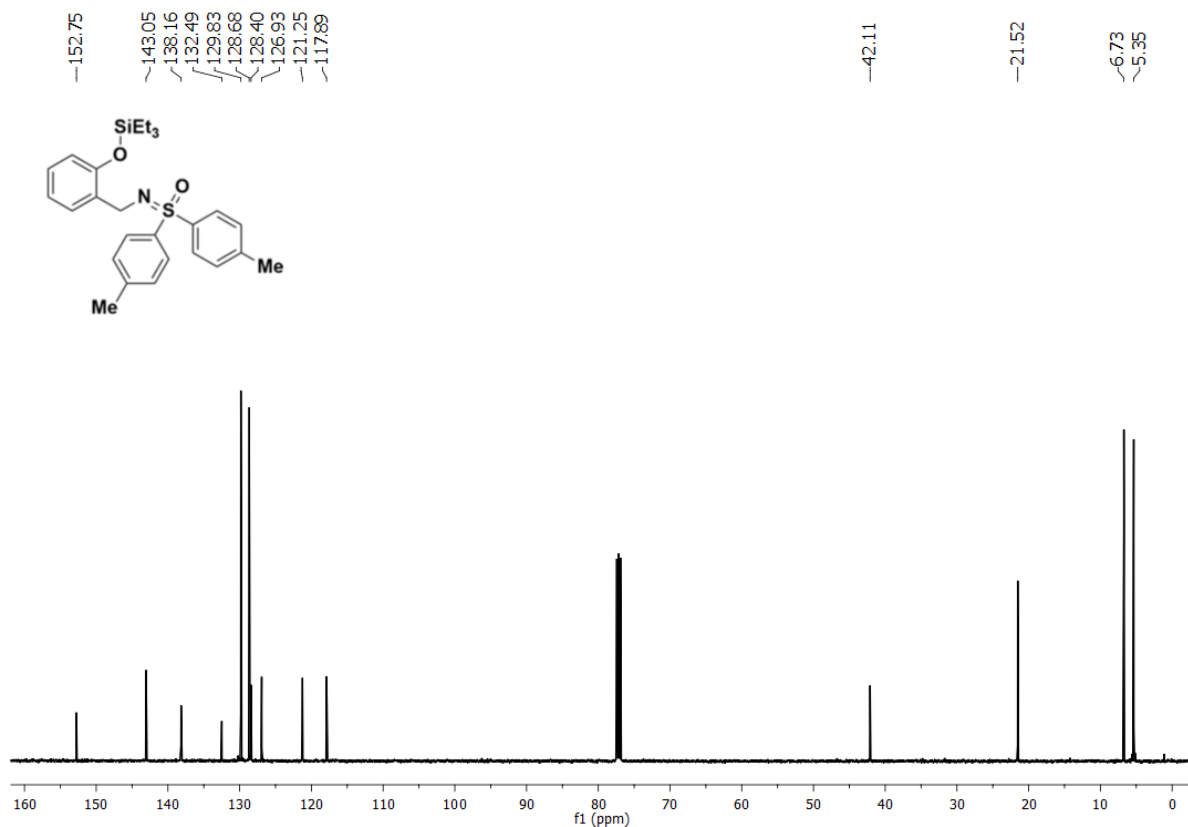

$^1\text{H}$  NMR of **4p** (500 MHz,  $\text{CDCl}_3$ )

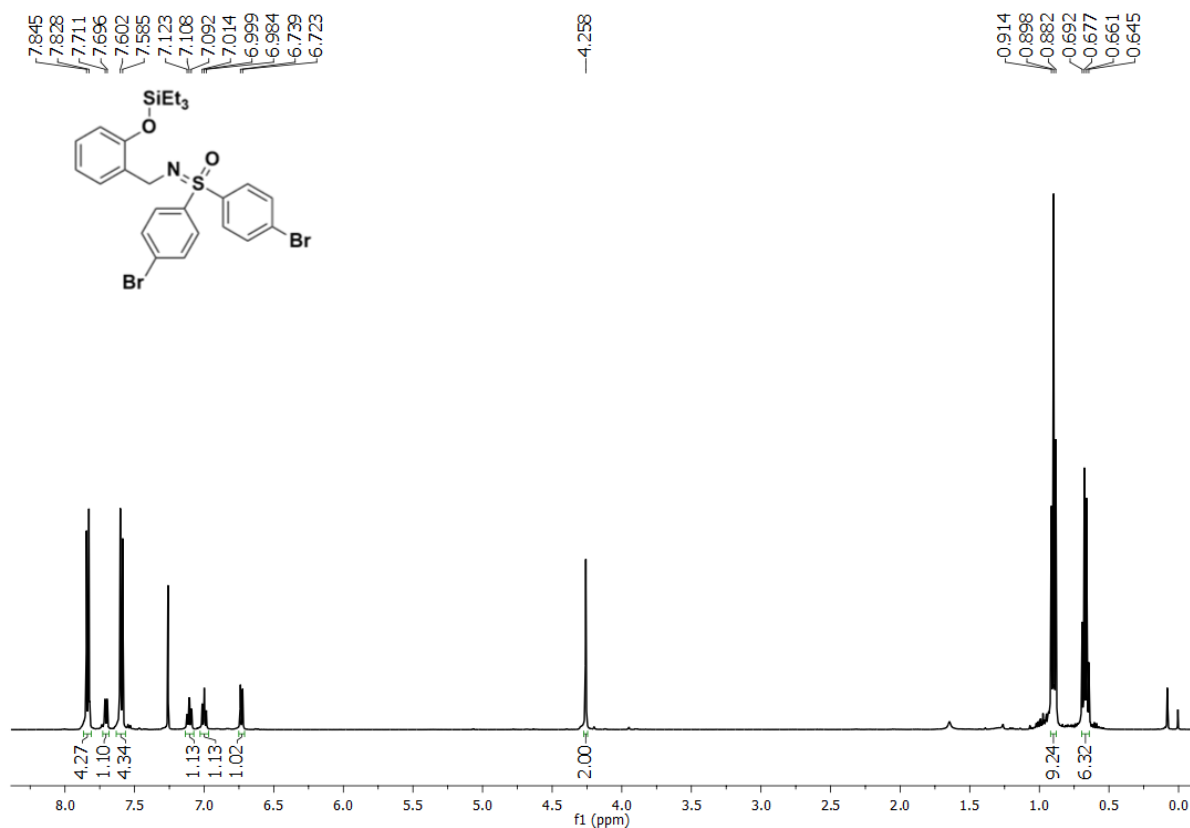

$^{13}\text{C}$  { $^1\text{H}$ } NMR of **4p** (126 MHz,  $\text{CDCl}_3$ )

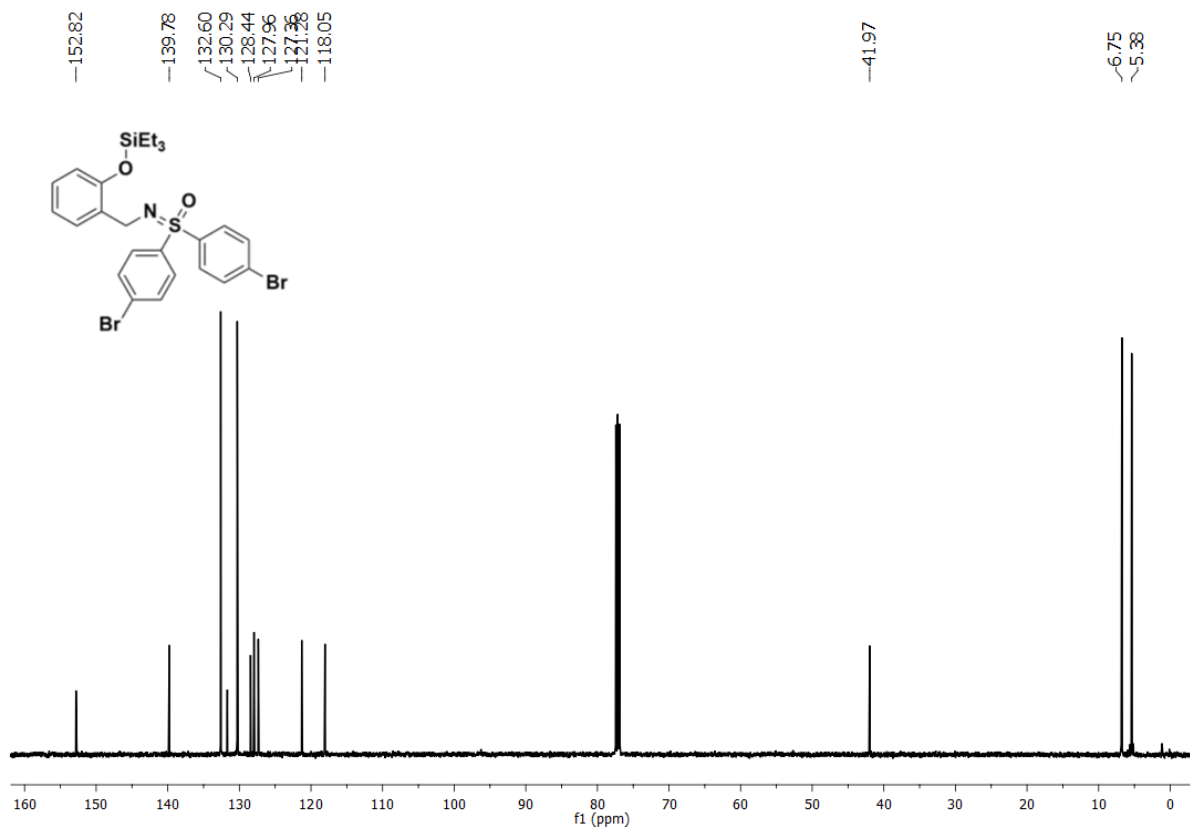

$^1\text{H}$  NMR of **4q** (500 MHz,  $\text{CDCl}_3$ )

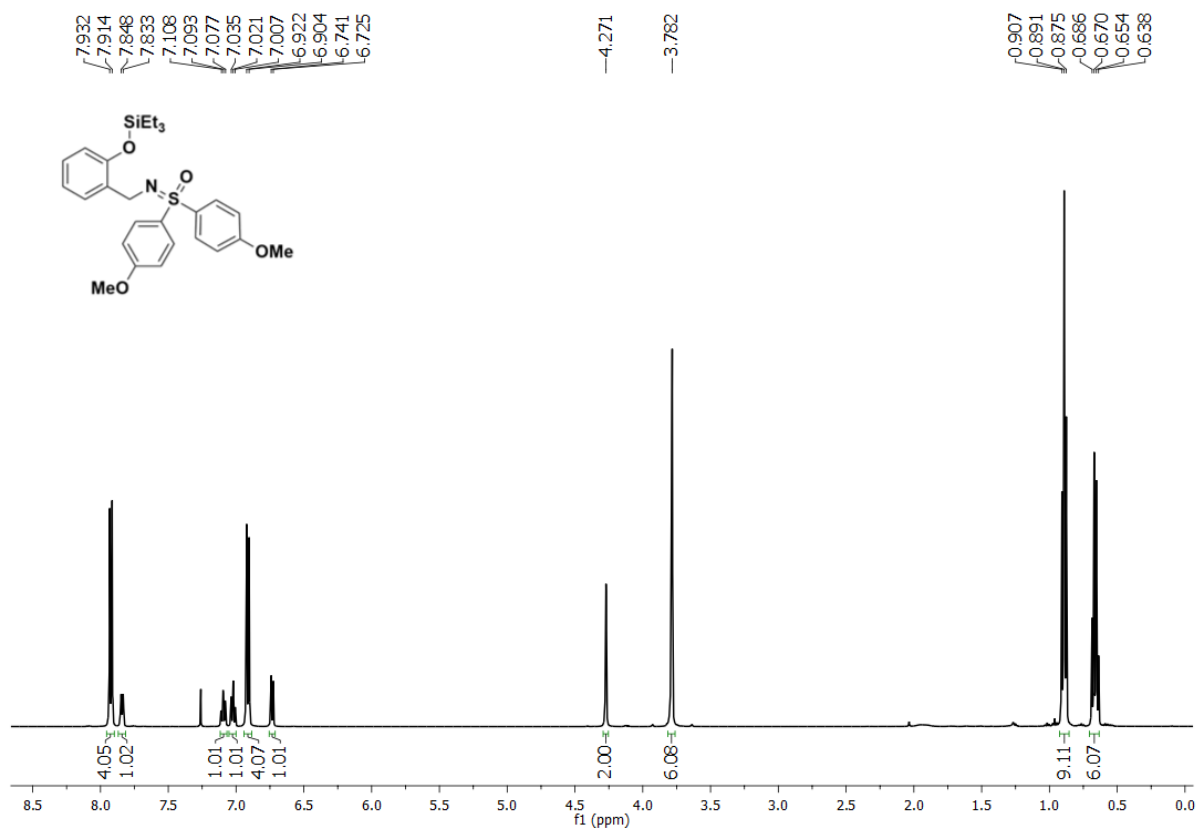

$^{13}\text{C}$  { $^1\text{H}$ } NMR of **4q** (126 MHz,  $\text{CDCl}_3$ )

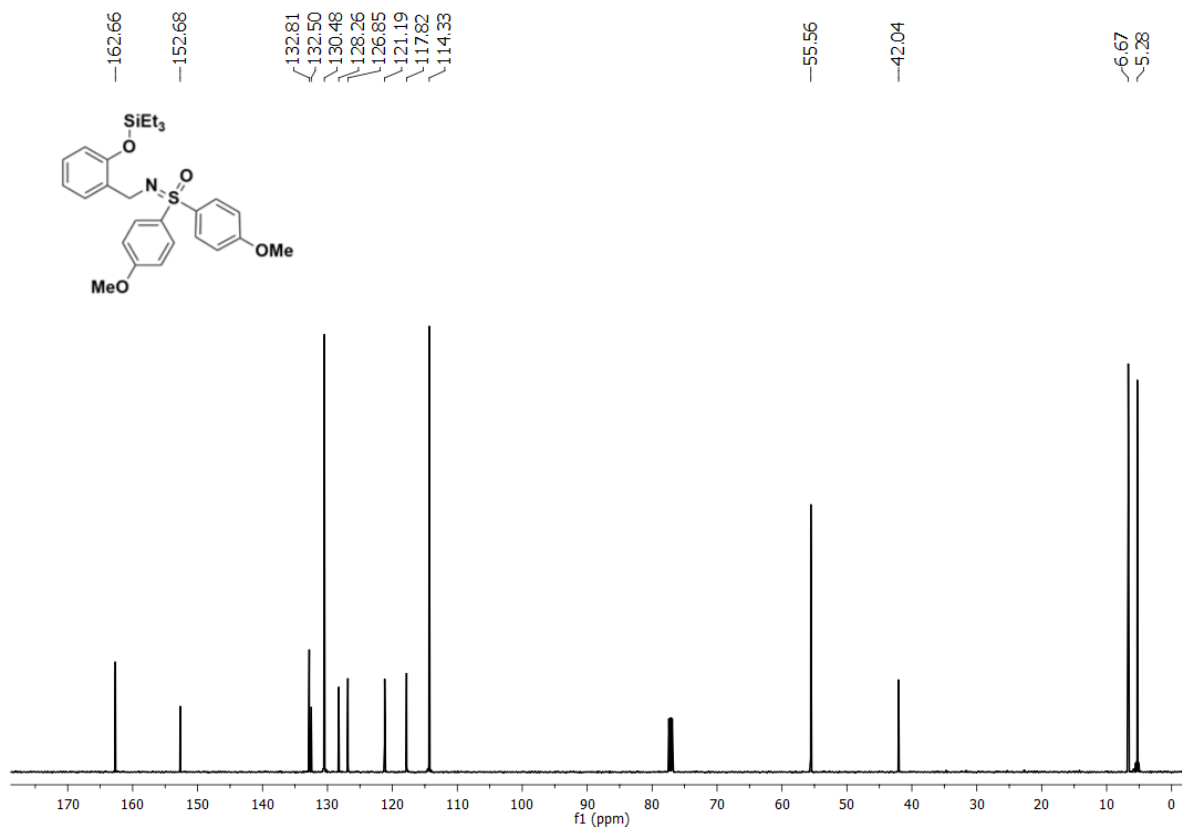

$^1\text{H}$  NMR of **4r** (500 MHz,  $\text{CDCl}_3$ )

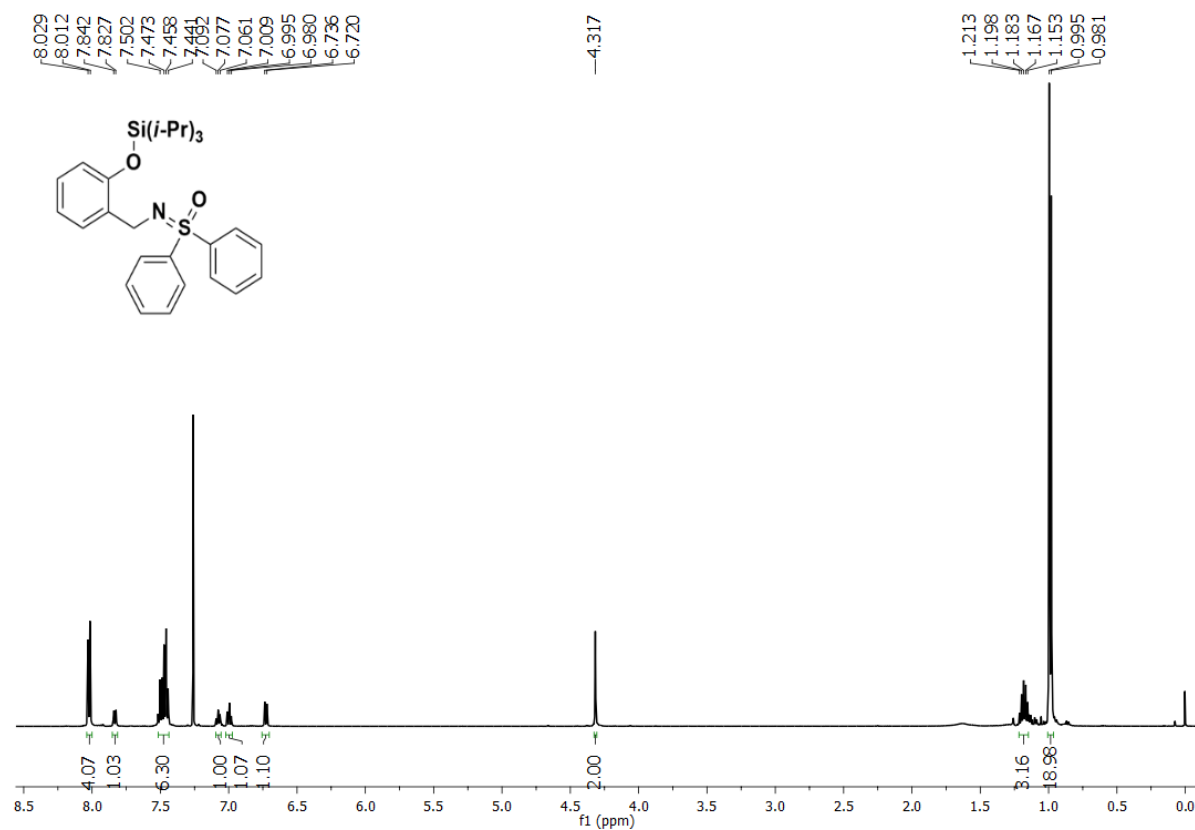

$^{13}\text{C}$  { $^1\text{H}$ } NMR of **4r** (126 MHz,  $\text{CDCl}_3$ )

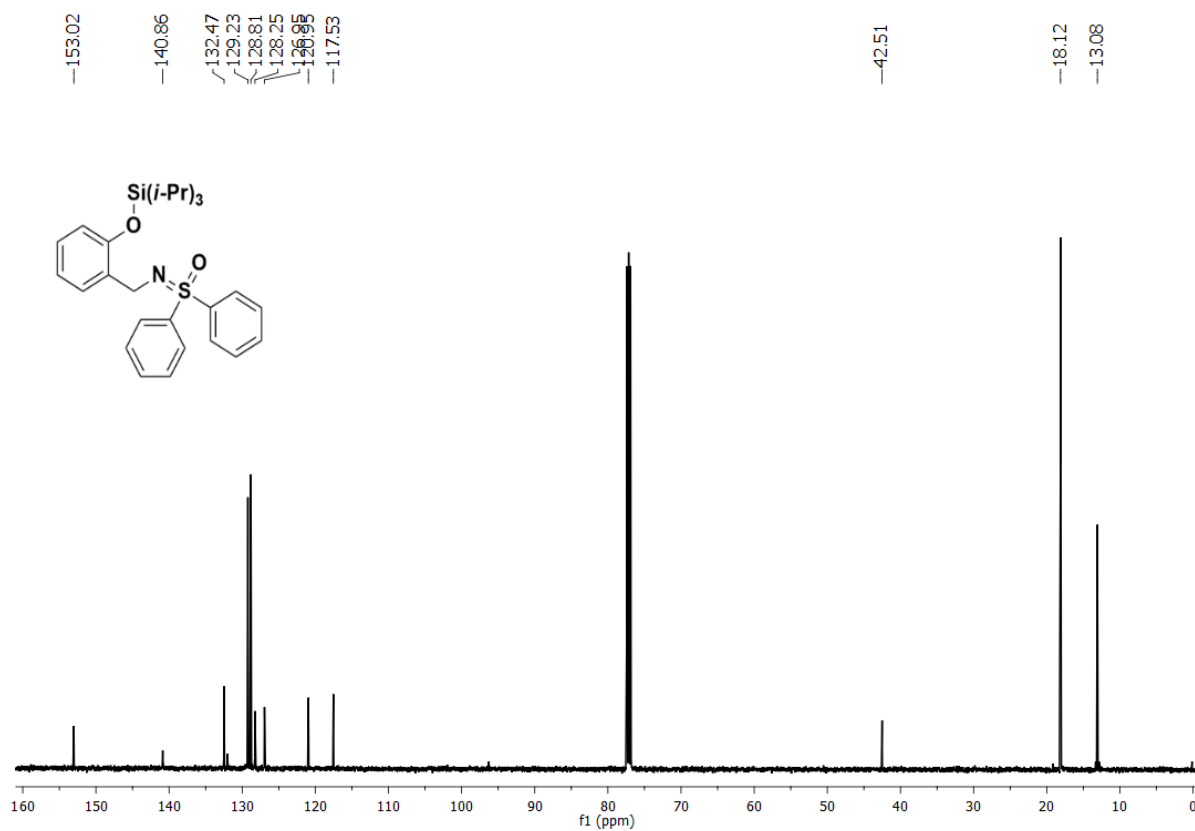

$^1\text{H}$  NMR of **4s** (500 MHz,  $\text{CDCl}_3$ )

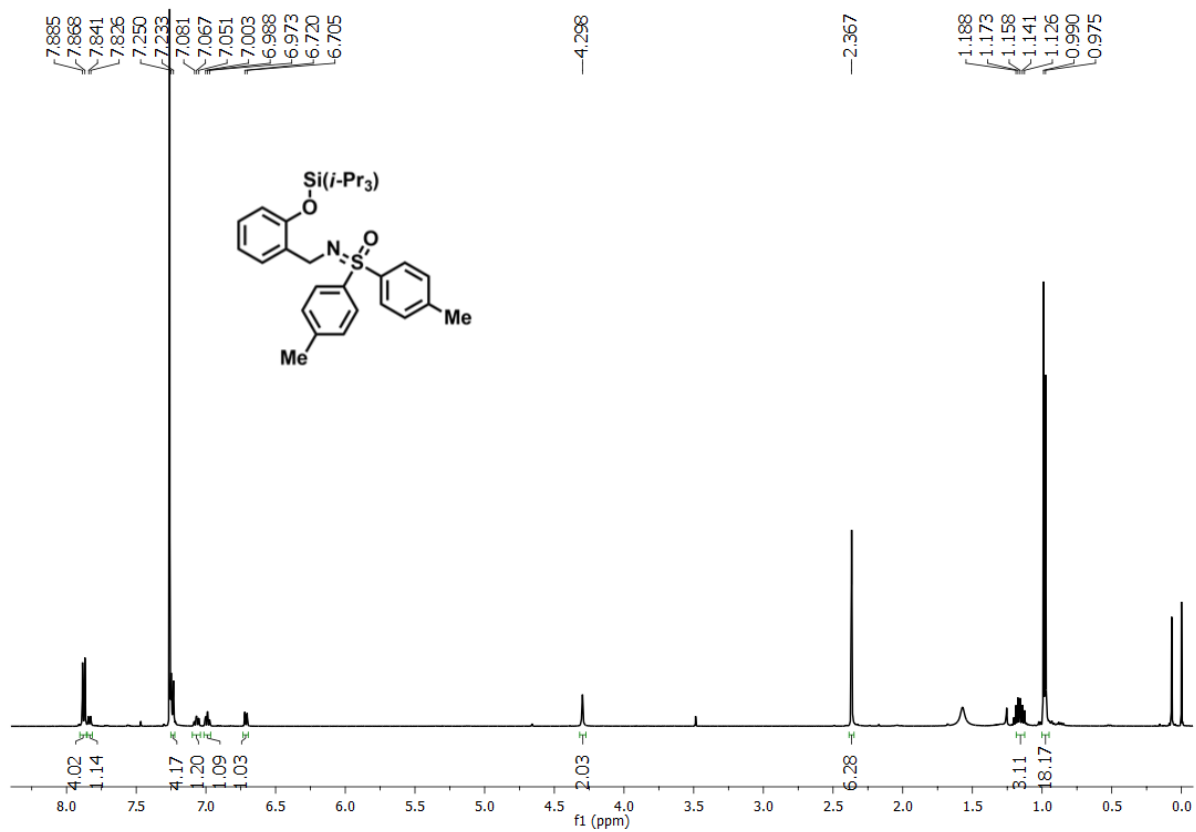

$^{13}\text{C}$  { $^1\text{H}$ } NMR of **4s** (126 MHz,  $\text{CDCl}_3$ )

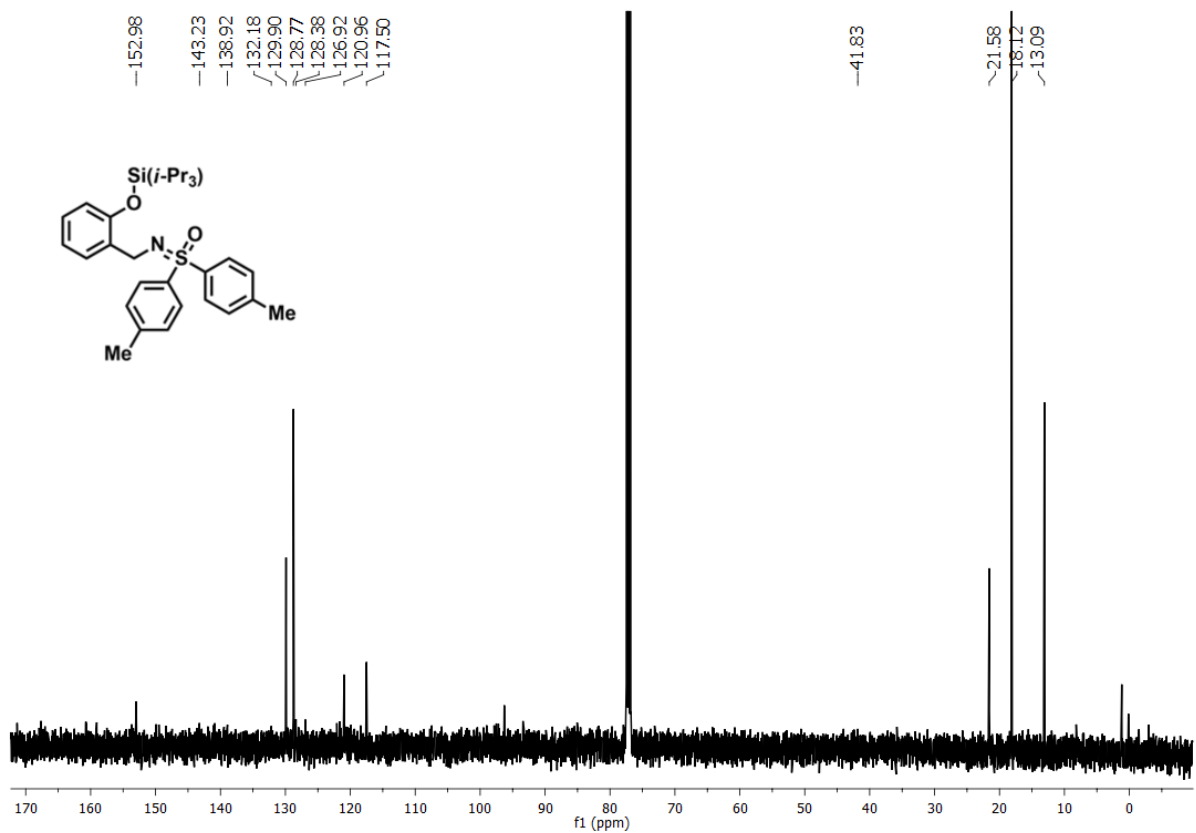

$^1\text{H}$  NMR of **4t** (500 MHz,  $\text{CDCl}_3$ )

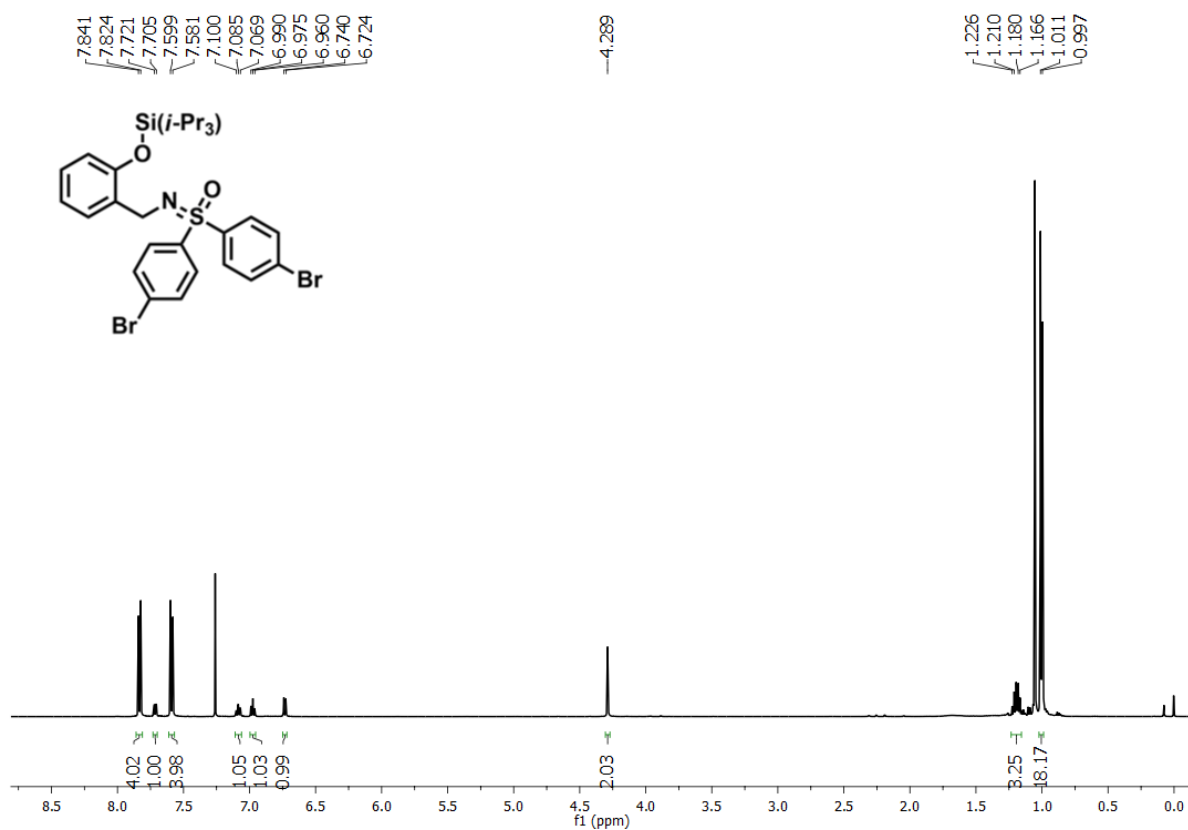

$^{13}\text{C}$  { $^1\text{H}$ } NMR of **4t** (126 MHz,  $\text{CDCl}_3$ )

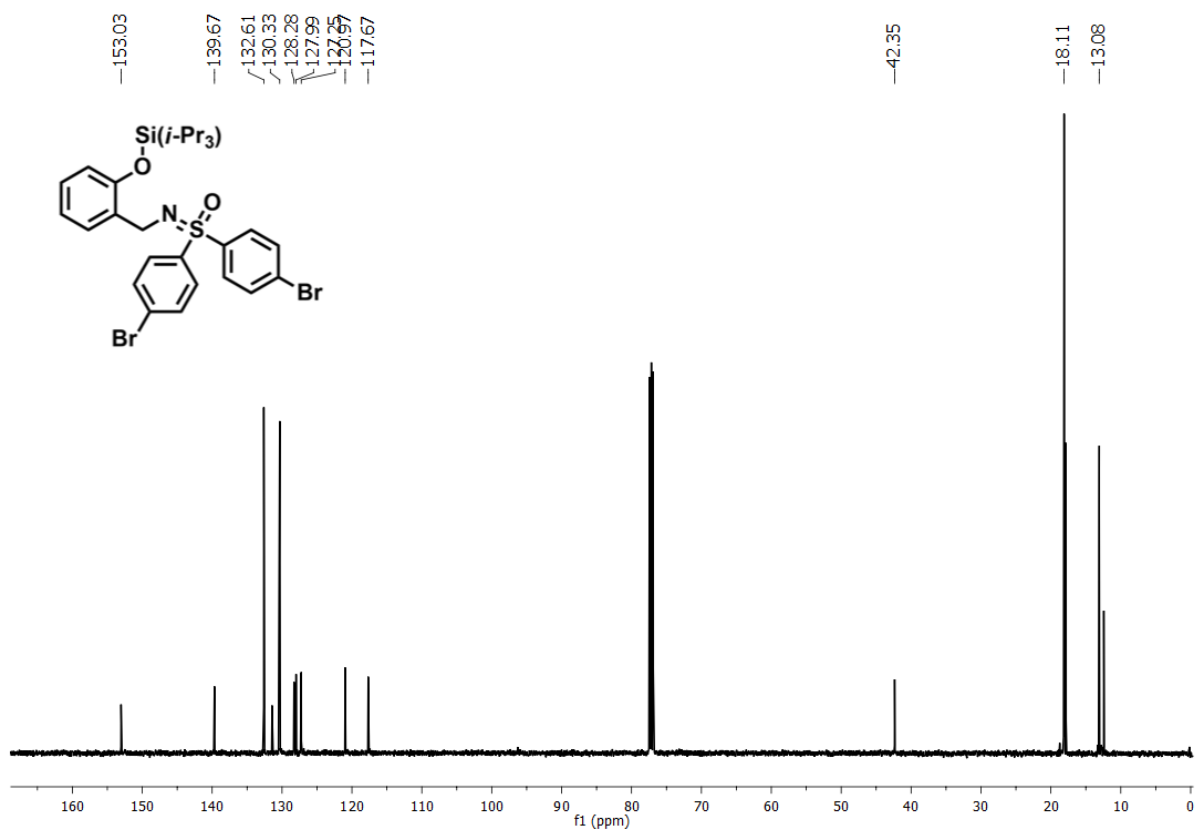



$^1\text{H}$  NMR of **5a** (500 MHz,  $\text{CDCl}_3$ )

7.905  
7.890  
7.617  
7.603  
7.588  
7.560  
7.545  
7.530  
7.394  
7.379  
7.307  
7.292  
7.278  
7.212  
7.198  
7.183

4.268  
4.239  
4.053  
4.024  
3.319  
3.290  
3.261  
3.252  
3.223  
3.194

1.276  
1.261  
1.246

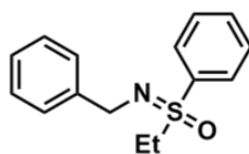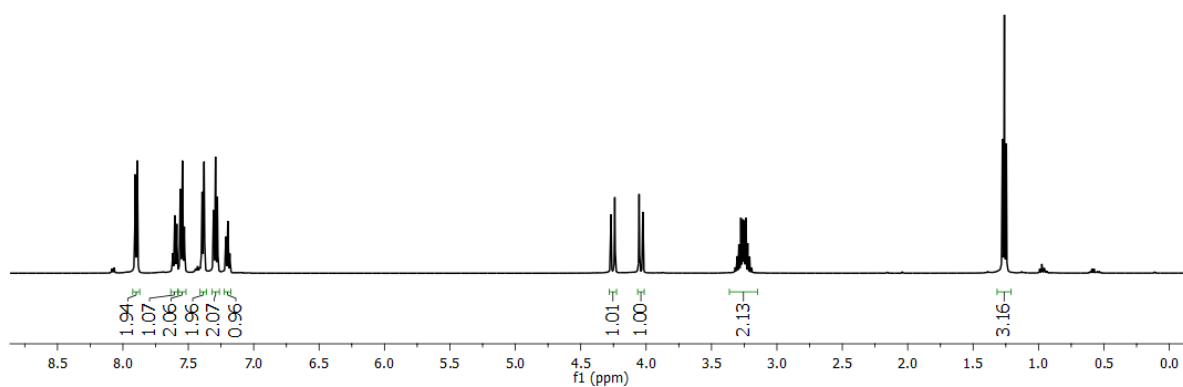

$^{13}\text{C}$  { $^1\text{H}$ } NMR of **5a** (126 MHz,  $\text{CDCl}_3$ )

141.51  
137.99  
133.01  
129.99  
129.46  
128.31  
127.89  
126.58

-51.01  
-47.22

-7.55

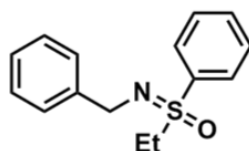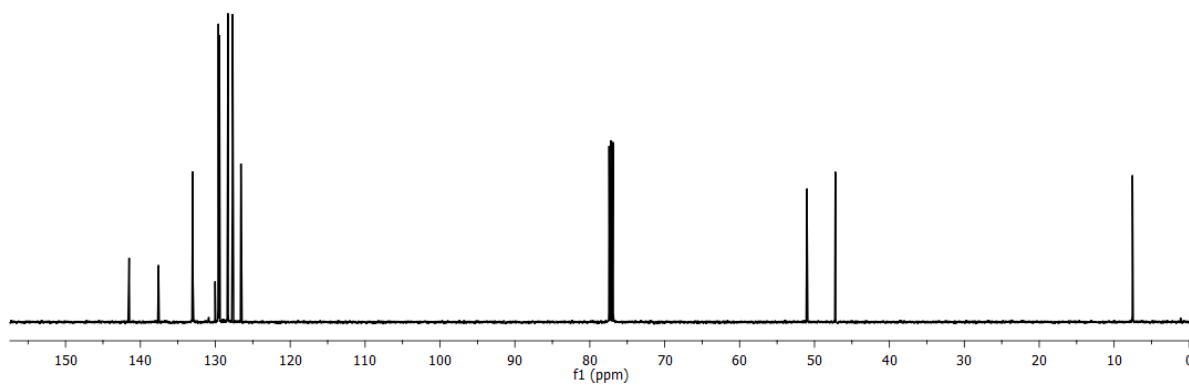

$^1\text{H}$  NMR of **5b** (500 MHz,  $\text{CDCl}_3$ )

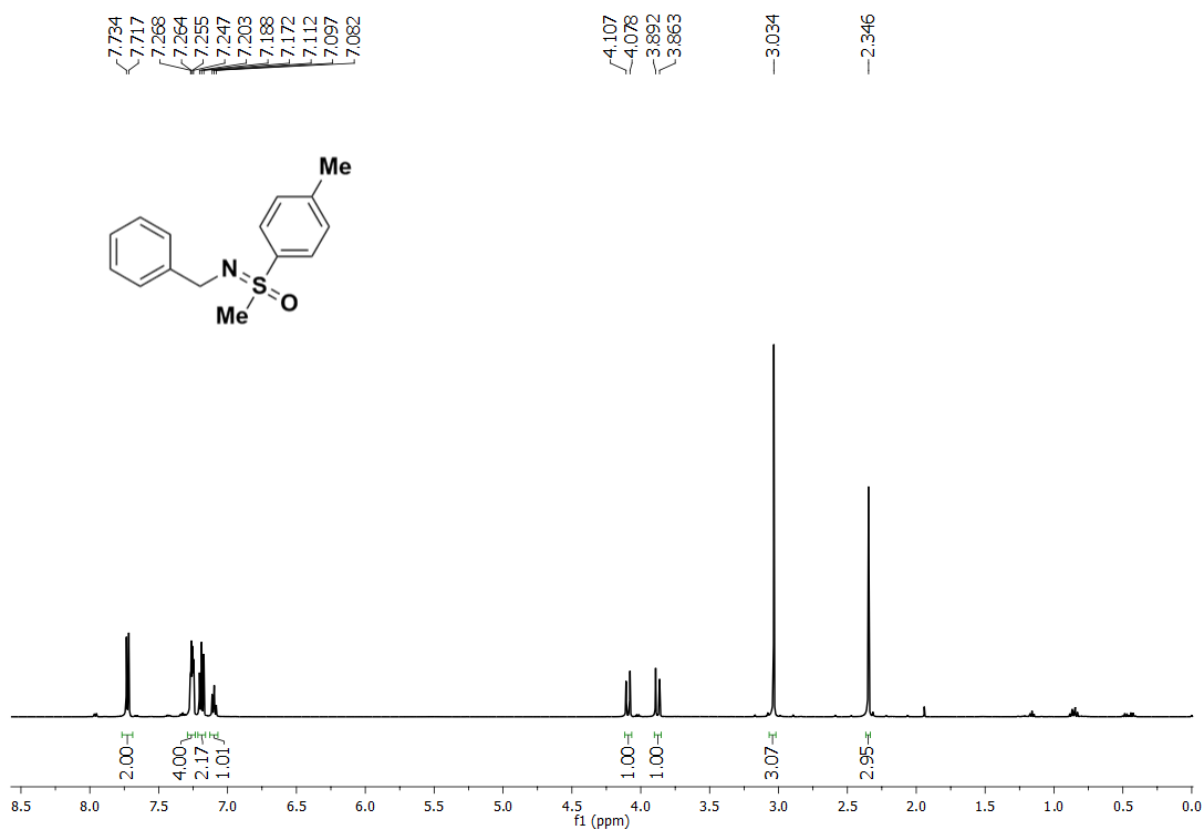

$^{13}\text{C}$  { $^1\text{H}$ } NMR of **5b** (126 MHz,  $\text{CDCl}_3$ )

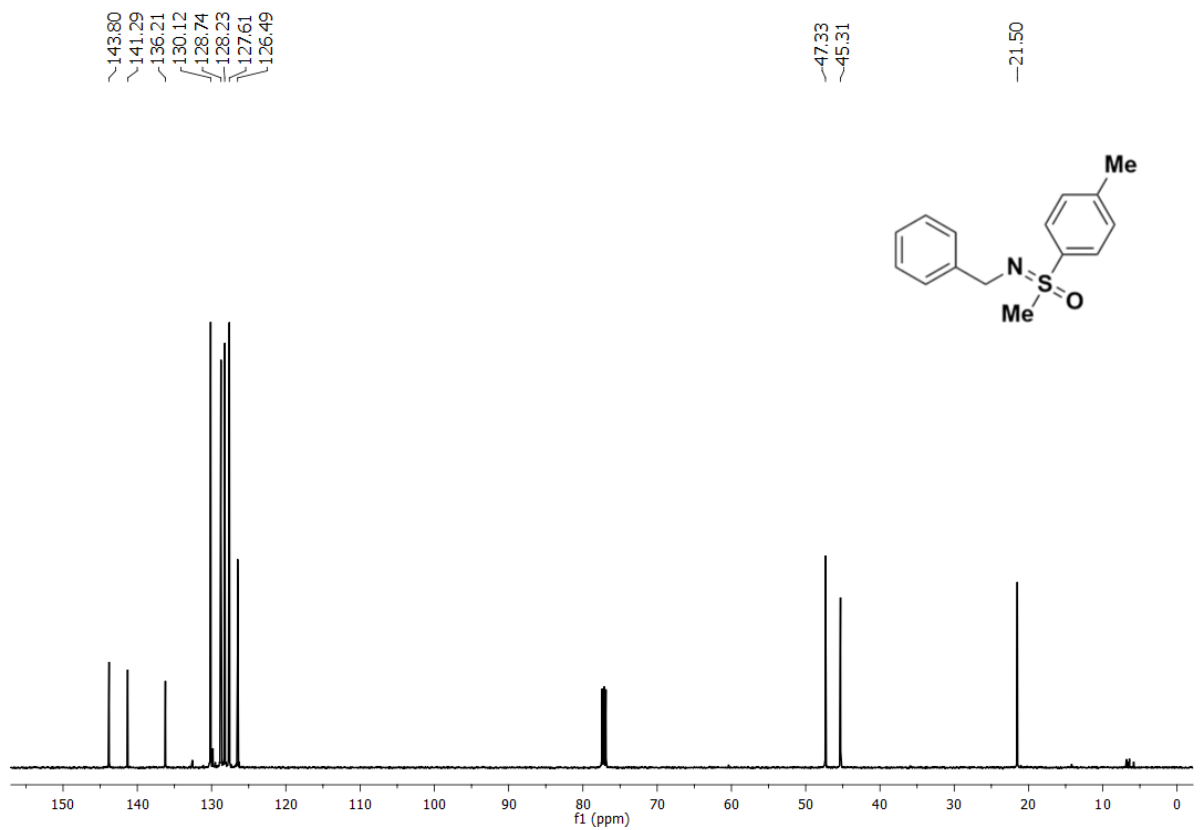

$^1\text{H}$  NMR of **5c** (500 MHz,  $\text{CDCl}_3$ )

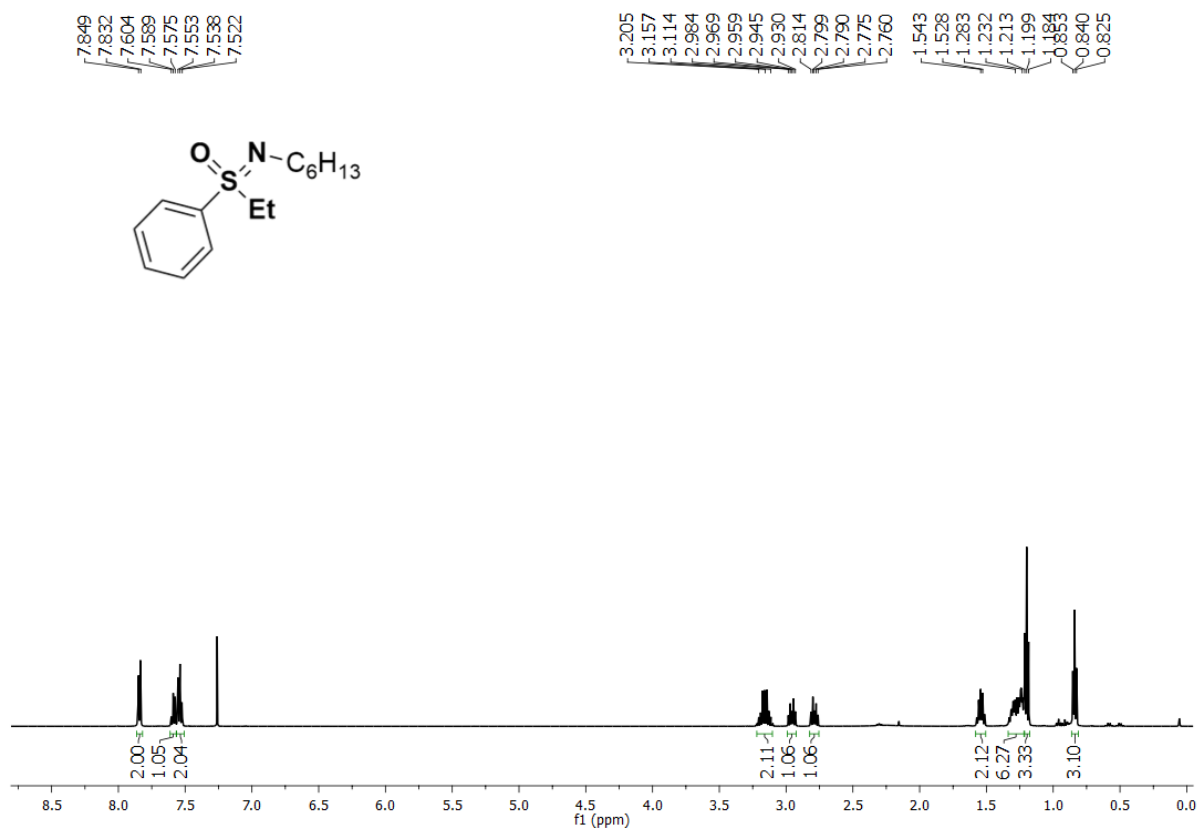

$^{13}\text{C}$  { $^1\text{H}$ } NMR of **5c** (126 MHz,  $\text{CDCl}_3$ )

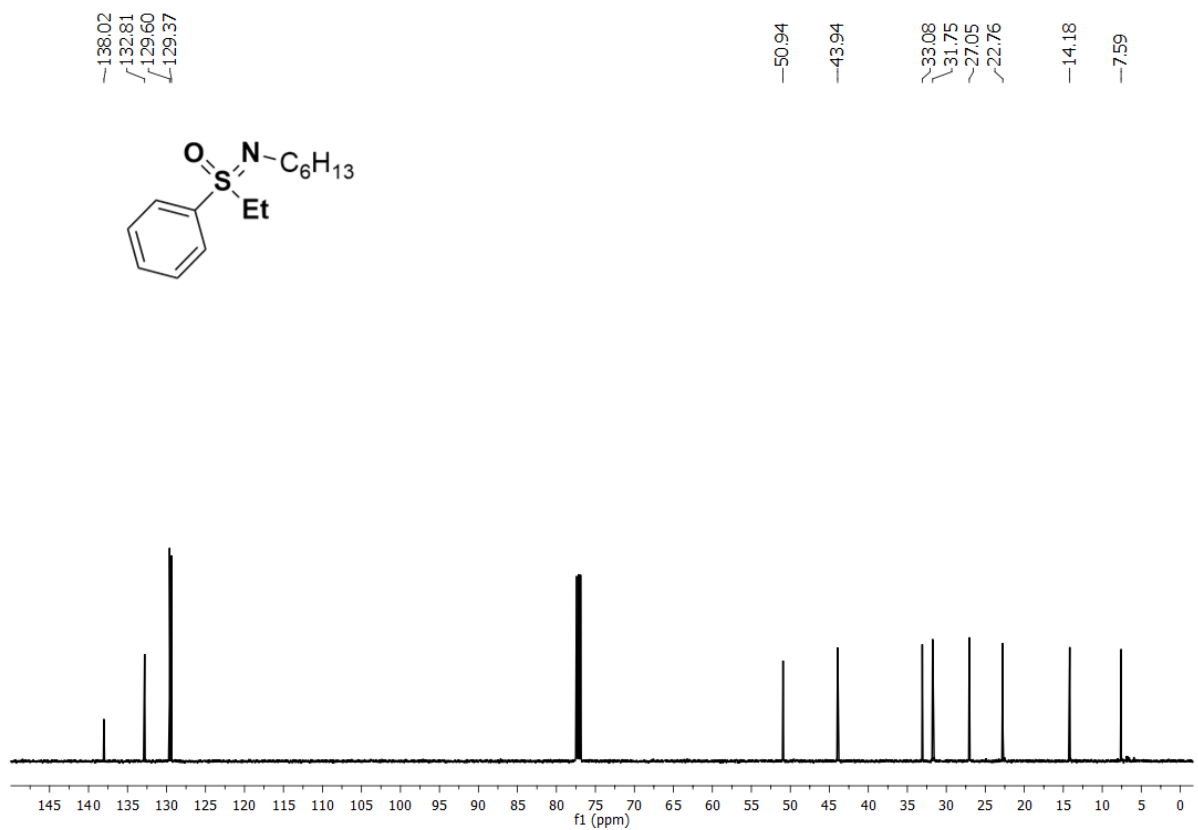

$^1\text{H}$  NMR of **5d** (500 MHz,  $\text{CDCl}_3$ )

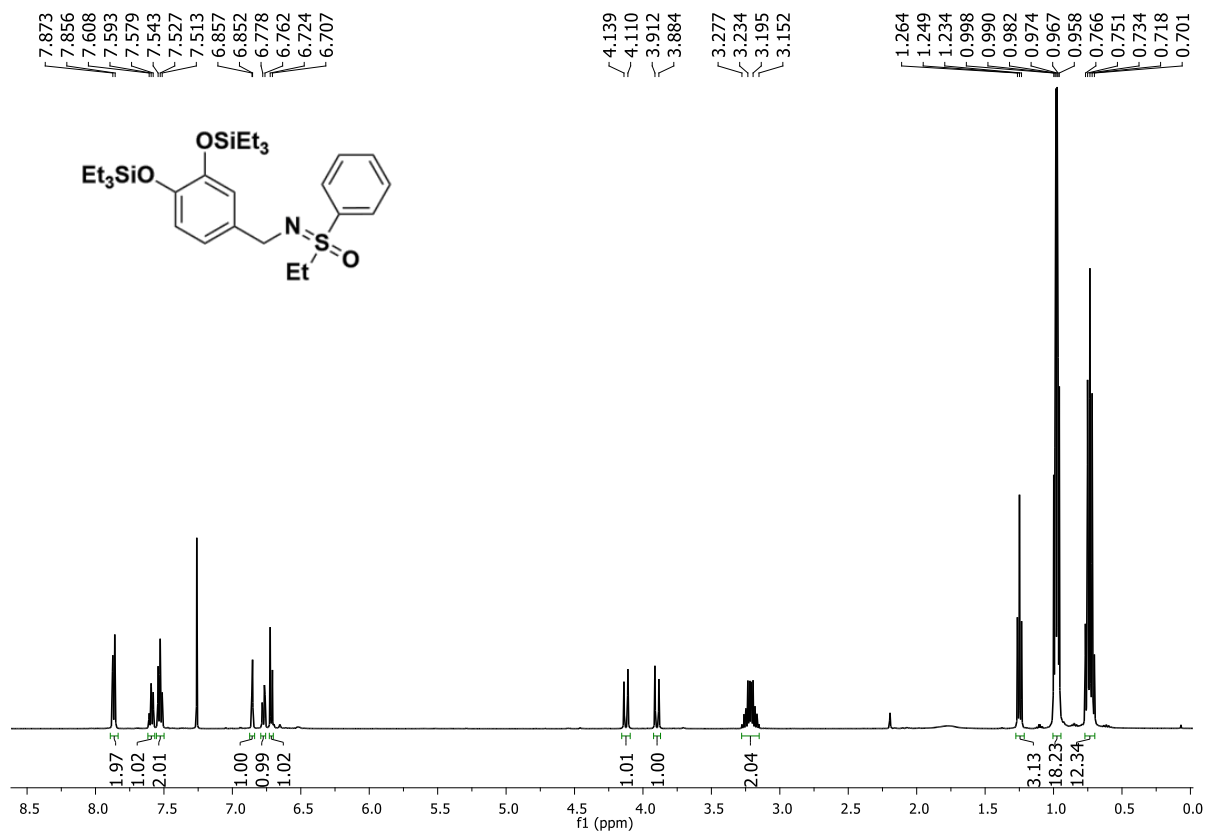

$^{13}\text{C}$  { $^1\text{H}$ } NMR of **5d** (126 MHz,  $\text{CDCl}_3$ )

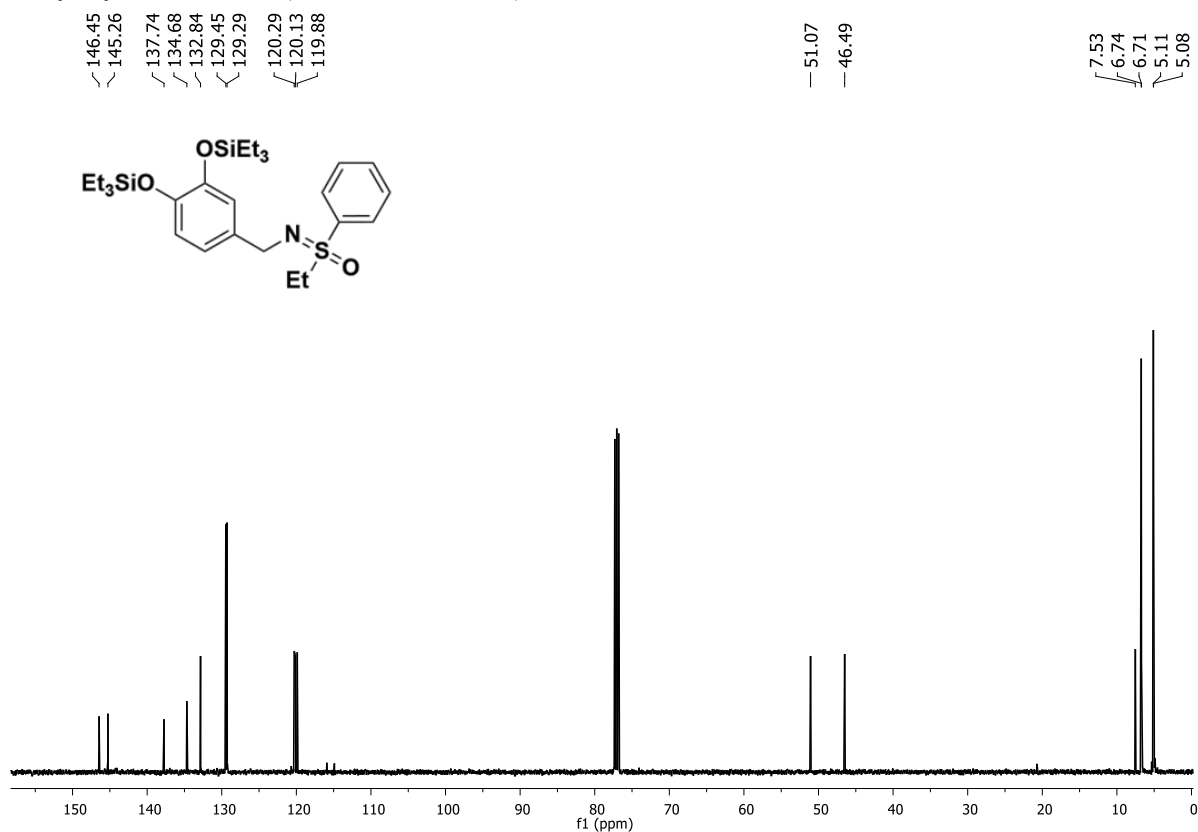

$^1\text{H}$  NMR of **7** (500 MHz,  $\text{CDCl}_3$ )

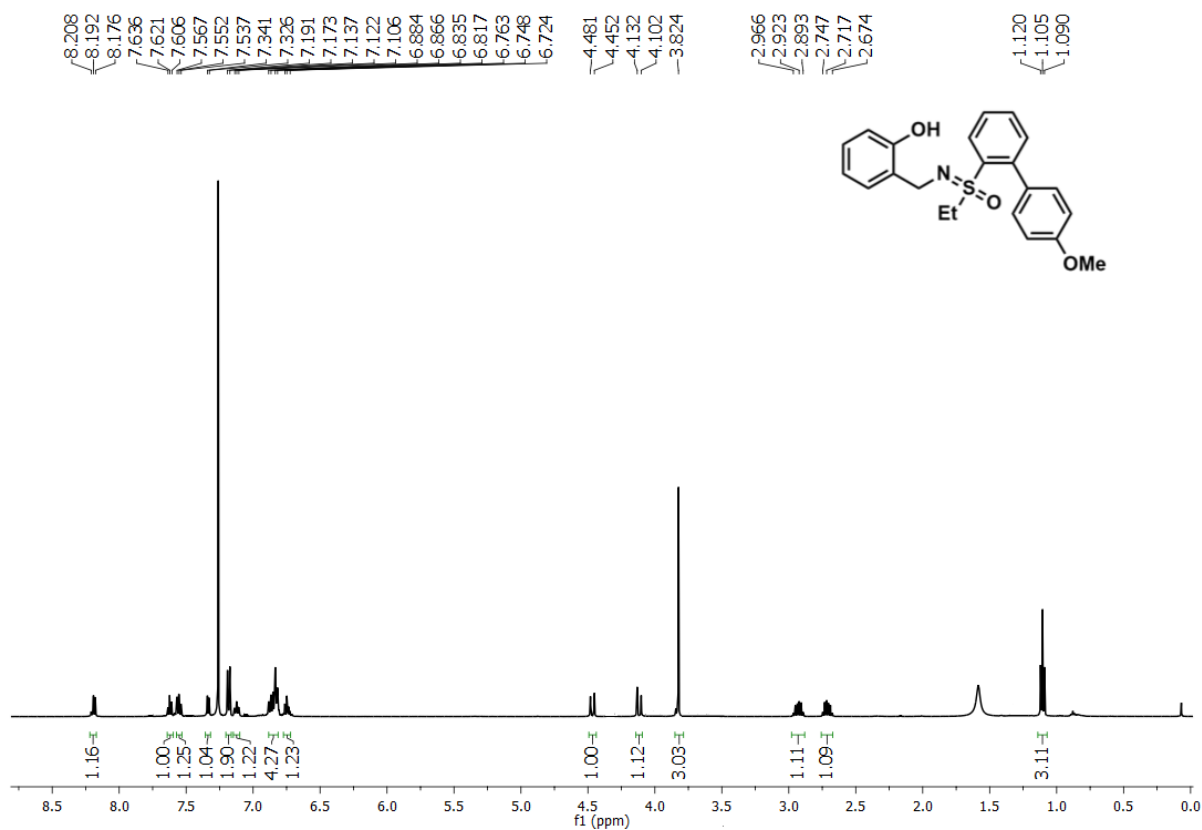

$^{13}\text{C}$  { $^1\text{H}$ } NMR of **7** (126 MHz,  $\text{CDCl}_3$ )

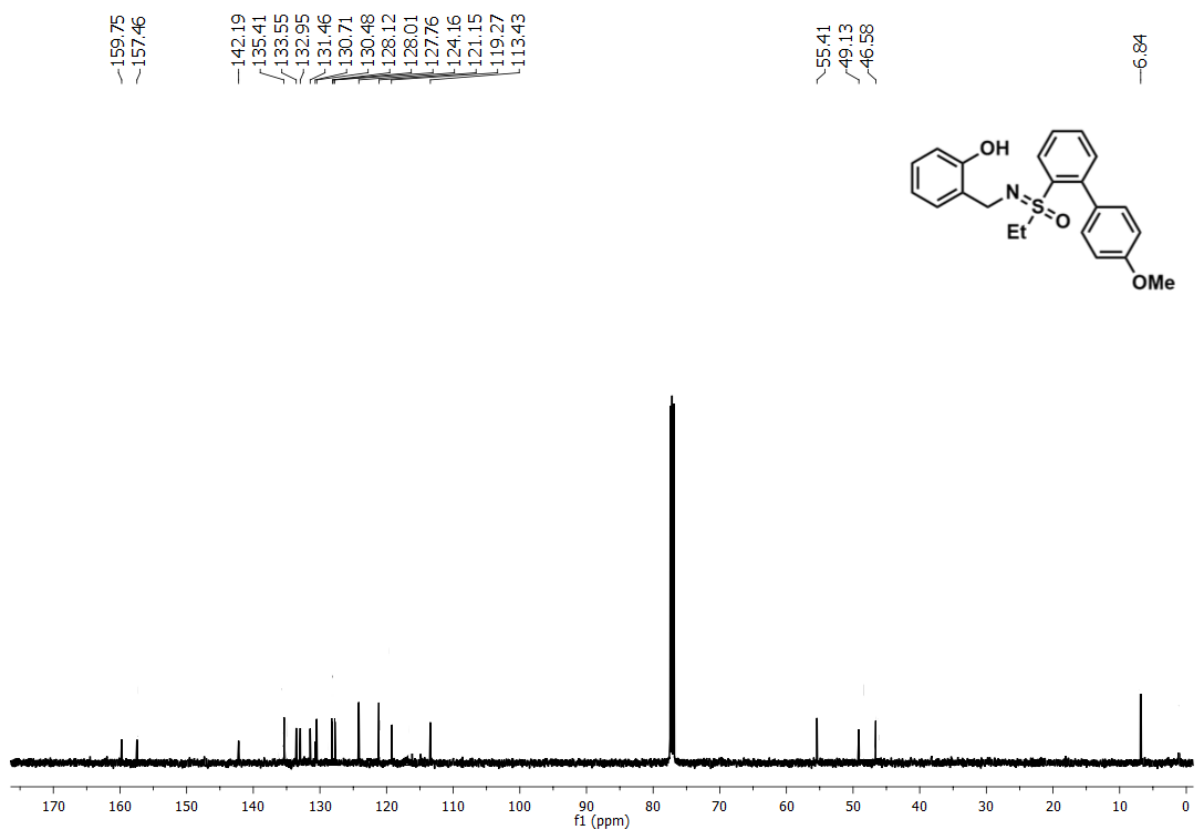

Supplement: d4ob00713a3.pdf [file d4ob00713a3.pdf]
